# Supplementary material
Source: PubMed Central journal article supplement (PMC5228623)
Supplement: NIHMS817814-supplement-statistical_information.pdf [file NIHMS817814-supplement-statistical_information.pdf]

## Figure 1

Fig.1b One-way ANOVA:  $F=24.93$ ,  $p<0.0001$  (n=3 for primary hPSC #1, 2, primary hPSC and mPSC; n=4 for hPSC#2, IMR90 and MiaPaCa2; n=6 for 8988T, hPSC#1 and control media).

| Tukey's multiple comparisons test | p Value  |                                     |          |
|-----------------------------------|----------|-------------------------------------|----------|
| ctrl media vs. 8988T CM           | 0.9881   | MiaPaCa CM vs. Primary mPSC         | 0.0012   |
| ctrl media vs. MiaPaCa CM         | 0.9997   | MiaPaCa CM vs. mPSC                 | 0.0002   |
| ctrl media vs. IMR90 CM           | 0.3703   | IMR90 CM vs. Primary hPSC #1        | 0.5948   |
| ctrl media vs. Primary hPSC #1    | 0.0044   | IMR90 CM vs. Primary hPSC #2        | 0.9768   |
| ctrl media vs. Primary hPSC #2    | 0.0497   | IMR90 CM vs. hPSC #1                | 0.0386   |
| ctrl media vs. hPSC #1            | < 0.0001 | IMR90 CM vs. hPSC #2                | 0.1544   |
| ctrl media vs. hPSC #2            | 0.0002   | IMR90 CM vs. Primary mPSC           | 0.4294   |
| ctrl media vs. Primary mPSC       | 0.0020   | IMR90 CM vs. mPSC                   | 0.1437   |
| ctrl media vs. mPSC               | 0.0003   | Primary hPSC #1 vs. Primary hPSC #2 | 0.9976   |
| 8988T CM vs. MiaPaCa CM           | 0.8622   | Primary hPSC #1 vs. hPSC #1         | 0.9886   |
| 8988T CM vs. IMR90 CM             | 0.8978   | Primary hPSC #1 vs. hPSC #2         | 0.9996   |
| 8988T CM vs. Primary hPSC #1      | 0.0381   | Primary hPSC #1 vs. Primary mPSC    | > 0.9999 |
| 8988T CM vs. Primary hPSC #2      | 0.2774   | Primary hPSC #1 vs. mPSC            | 0.9973   |
| 8988T CM vs. hPSC #1              | 0.0002   | Primary hPSC #2 vs. hPSC #1         | 0.6227   |
| 8988T CM vs. hPSC #2              | 0.0022   | Primary hPSC #2 vs. hPSC #2         | 0.8711   |
| 8988T CM vs. Primary mPSC         | 0.0190   | Primary hPSC #2 vs. Primary mPSC    | 0.9845   |
| 8988T CM vs. mPSC                 | 0.0031   | Primary hPSC #2 vs. mPSC            | 0.8077   |
| MiaPaCa CM vs. IMR90 CM           | 0.1985   | hPSC #1 vs. hPSC #2                 | > 0.9999 |
| MiaPaCa CM vs. Primary hPSC #1    | 0.0025   | hPSC #1 vs. Primary mPSC            | 0.9990   |
| MiaPaCa CM vs. Primary hPSC #2    | 0.0253   | hPSC #1 vs. mPSC                    | > 0.9999 |
| MiaPaCa CM vs. hPSC #1            | < 0.0001 | hPSC #2 vs. Primary mPSC            | > 0.9999 |
| MiaPaCa CM vs. hPSC #2            | 0.0001   | hPSC #2 vs. mPSC                    | > 0.9999 |
|                                   |          | Primary mPSC vs. mPSC               | 0.9998   |

Fig.1c One-way ANOVA:  $F=15.34$ ,  $p<0.0001$  (n=4)

| Tukey's multiple comparisons test  | p Value  |                                |        |
|------------------------------------|----------|--------------------------------|--------|
| Boiled hPSC CM vs. Boiled 8988T CM | 0.0011   | Boiled 8988T CM vs. 8988T CM   | 0.1944 |
| Boiled hPSC CM vs. hPSC CM         | 0.5944   | Boiled 8988T CM vs. ctrl media | 0.8871 |
| Boiled hPSC CM vs. 8988T CM        | 0.0908   | hPSC CM vs. 8988T CM           | 0.0055 |
| Boiled hPSC CM vs. ctrl media      | 0.0064   | hPSC CM vs. ctrl media         | 0.0004 |
| Boiled 8988T CM vs. hPSC CM        | < 0.0001 | 8988T CM vs. ctrl media        | 0.6378 |

Fig.1d Unpaired two-tailed T-test (n=3)

| Ala | hPSC #1 CM vs 8988T CM            | 0.0175 | Asp | hPSC #1 CM vs 8988T CM | 0.0351 |
|-----|-----------------------------------|--------|-----|------------------------|--------|
|     | Double CM vs hPSC#1 CM            | 0.0177 |     | hPSC #1 CM vs 8988T CM | 0.0238 |
|     | 8988T cells + hPSC CM vs 8988T CM | 0.0193 |     | hPSC #1 CM vs 8988T CM | 0.0423 |

Fig.1e One-way ANOVA:  $F=11.50$ ,  $p<0.0001$  (n=4)

| Tukey's multiple comparisons test | p Value |                          |          |
|-----------------------------------|---------|--------------------------|----------|
| 1mM NeAAs vs. 1mM Ala             | 0.9914  | 1mM NeAAs vs. 1mM Cys    | 0.0106   |
| 1mM NeAAs vs. 1mM Asp             | 0.0387  | 1mM NeAAs vs. hPSC CM    | 0.8053   |
| 1mM NeAAs vs. 1mM Gly             | 0.0004  | 1mM NeAAs vs. 8988T CM   | 0.0005   |
|                                   |         | 1mM NeAAs vs. ctrl media | < 0.0001 |
|                                   |         | 1mM Ala vs. 1mM Asp      | 0.1943   |

|                        |        |                         |          |
|------------------------|--------|-------------------------|----------|
| 1mM Ala vs. 1mM Gly    | 0.0029 | 1mM Gly vs. 1mM Cys     | 0.8737   |
| 1mM Ala vs. 1mM Cys    | 0.0645 | 1mM Gly vs. hPSC CM     | 0.0151   |
| 1mM Ala vs. hPSC CM    | 0.9966 | 1mM Gly vs. 8988T CM    | > 0.9999 |
| 1mM Ala vs. 8988T CM   | 0.0032 | 1mM Gly vs. ctrl media  | 0.8823   |
| 1mM Ala vs. ctrl media | 0.0001 | 1mM Cys vs. hPSC CM     | 0.2409   |
| 1mM Asp vs. 1mM Gly    | 0.5602 | 1mM Cys vs. 8988T CM    | 0.8894   |
| 1mM Asp vs. 1mM Cys    | 0.9990 | 1mM Cys vs. ctrl media  | 0.1831   |
| 1mM Asp vs. hPSC CM    | 0.5392 | hPSC CM vs. 8988T CM    | 0.0165   |
| 1mM Asp vs. 8988T CM   | 0.5849 | hPSC CM vs. ctrl media  | 0.0006   |
| 1mM Asp vs. ctrl media | 0.0601 | 8988T CM vs. ctrl media | 0.8661   |

Fig.1f Unpaired two-tailed T-test (n=3)

|                        |         |
|------------------------|---------|
| hPSC#1 CM vs 8988T CM  | <0.0001 |
| hPSC#1 CM vs tu8902 CM | <0.0001 |
| 8988T CM vs tu8902 CM  | 0.2346  |

## Figure2

Fig.2b One-way ANOVA: F=162.8, p<0.0001 (n=3)

| Tukey's multiple comparisons test | P Value  |                                   |          |
|-----------------------------------|----------|-----------------------------------|----------|
| hPSC CM shGFP vs. 8T CM shGFP     | < 0.0001 | 8T CM shGFP vs. hPSC CM shGPT2    | < 0.0001 |
| hPSC CM shGFP vs. hPSC CM shGPT1  | 0.0082   | 8T CM shGFP vs. 8T CM shGPT2      | 0.9344   |
| hPSC CM shGFP vs. 8T CM shGPT1    | < 0.0001 | hPSC CM shGPT1 vs. 8T CM shGPT1   | < 0.0001 |
| hPSC CM shGFP vs. hPSC CM shGPT2  | 0.0014   | hPSC CM shGPT1 vs. hPSC CM shGPT2 | 0.8750   |
| hPSC CM shGFP vs. 8T CM shGPT2    | < 0.0001 | hPSC CM shGPT1 vs. 8T CM shGPT2   | < 0.0001 |
| 8T CM shGFP vs. hPSC CM shGPT1    | < 0.0001 | 8T CM shGPT1 vs. hPSC CM shGPT2   | < 0.0001 |
| 8T CM shGFP vs. 8T CM shGPT1      | 0.8573   | 8T CM shGPT1 vs. 8T CM shGPT2     | 0.3695   |
|                                   |          | hPSC CM shGPT2 vs. 8T CM shGPT2   | < 0.0001 |

Fig.2c One-way ANOVA: F=13.27, p<0.0001 (n=3)

| Tukey's multiple comparisons test   | p Value  |                                          |          |
|-------------------------------------|----------|------------------------------------------|----------|
| shGFP ctrl vs shGFP + 8T CM         | 0.9997   | shGFP + hPSC CM vs shGPT1 1 + 8T CM      | < 0.0001 |
| shGFP ctrl vs shGFP + hPSC CM       | < 0.0001 | shGFP + hPSC CM vs shGPT1 1 + hPSC CM    | 0.0625   |
| shGFP ctrl vs shGPT1 1 + 8T CM      | 0.4029   | shGFP + hPSC CM vs shGPT1 2 + 8T CM      | < 0.0001 |
| shGFP ctrl vs shGPT1 1 + hPSC CM    | 0.0615   | shGFP + hPSC CM vs shGPT2 1 + 8T CM      | 0.0369   |
| shGFP ctrl vs shGPT1 2 + 8T CM      | 0.9884   | shGFP + hPSC CM vs shGPT2 1 + hPSC CM    | 0.0711   |
| shGFP ctrl vs shGPT1 2 + hPSC CM    | 0.1018   | shGFP + hPSC CM vs shGPT2 2 + 8T CM      | 0.0004   |
| shGFP ctrl vs shGPT2 1 + 8T CM      | 0.9758   | shGFP + hPSC CM vs shGPT2 2 + hPSC CM    | 0.0179   |
| shGFP ctrl vs shGPT2 1 + hPSC CM    | 0.0540   | shGPT1 1 + 8T CM vs shGPT1 1 + hPSC CM   | 0.0003   |
| shGFP ctrl vs shGPT2 2 + 8T CM      | 0.9649   | shGPT1 1 + 8T CM vs shGPT1 2 + 8T CM     | 0.9528   |
| shGFP ctrl vs shGPT2 2 + hPSC CM    | 0.1881   | shGPT1 1 + 8T CM vs shGPT1 2 + hPSC CM   | 0.0005   |
| shGFP + 8T CM vs shGFP + hPSC CM    | 0.0001   | shGPT1 1 + 8T CM vs shGPT2 1 + 8T CM     | 0.0463   |
| shGFP + 8T CM vs shGPT1 1 + 8T CM   | 0.1310   | shGPT1 1 + 8T CM vs shGPT2 1 + hPSC CM   | 0.0002   |
| shGFP + 8T CM vs shGPT1 1 + hPSC CM | 0.2234   | shGPT1 1 + 8T CM vs shGPT2 2 + 8T CM     | 0.0400   |
| shGFP + 8T CM vs shGPT1 2 + 8T CM   | 0.7890   | shGPT1 1 + 8T CM vs shGPT2 2 + hPSC CM   | 0.0010   |
| shGFP + 8T CM vs shGPT1 2 + hPSC CM | 0.3334   | shGPT1 1 + hPSC CM vs shGPT1 2 + 8T CM   | 0.0057   |
| shGFP + 8T CM vs shGPT2 1 + 8T CM   | > 0.9999 | shGPT1 1 + hPSC CM vs shGPT1 2 + hPSC CM | > 0.9999 |
| shGFP + 8T CM vs shGPT2 1 + hPSC CM | 0.2005   |                                          |          |
| shGFP + 8T CM vs shGPT2 2 + 8T CM   | > 0.9999 | shGPT1 1 + hPSC CM vs shGPT2 1 + 8T CM   | 0.4817   |
| shGFP + 8T CM vs shGPT2 2 + hPSC CM | 0.5193   | shGPT1 1 + hPSC CM vs shGPT2 1 + hPSC    | > 0.9999 |

|                                          |          |                                          |          |
|------------------------------------------|----------|------------------------------------------|----------|
| CM                                       |          | shGPT1 2 + hPSC CM vs shGPT2 2 + 8T CM   | 0.6786   |
| shGPT1 1 + hPSC CM vs shGPT2 2 + 8T CM   | 0.5236   | shGPT1 2 + hPSC CM vs shGPT2 2 + hPSC CM | > 0.9999 |
| shGPT1 1 + hPSC CM vs shGPT2 2 + hPSC CM | > 0.9999 | shGPT2 1 + 8T CM vs shGPT2 1 + hPSC CM   | 0.4446   |
| shGPT1 2 + 8T CM vs shGPT2 1 + hPSC CM   | 0.0101   | shGPT2 1 + 8T CM vs shGPT2 2 + 8T CM     | > 0.9999 |
| shGPT1 2 + 8T CM vs shGPT2 1 + 8T CM     | 0.4781   | shGPT2 1 + 8T CM vs shGPT2 2 + hPSC CM   | 0.8237   |
| shGPT1 2 + 8T CM vs shGPT2 1 + hPSC CM   | 0.0050   | shGPT2 1 + hPSC CM vs shGPT2 2 + 8T CM   | 0.4854   |
| shGPT1 2 + 8T CM vs shGPT2 2 + 8T CM     | 0.4375   | shGPT2 1 + hPSC CM vs shGPT2 2 + hPSC CM | 0.9998   |
| shGPT1 2 + 8T CM vs shGPT2 2 + hPSC CM   | 0.0212   | shGPT2 2 + 8T CM vs shGPT2 2 + hPSC CM   | 0.8558   |
| shGPT1 2 + hPSC CM vs shGPT2 1 + 8T CM   | 0.6362   |                                          |          |
| shGPT1 2 + hPSC CM vs shGPT2 1 + hPSC CM | > 0.9999 |                                          |          |

Fig.2d One-way ANOVA:  $F=38.33$ ,  $p<0.0001$  (n=4)

| Tukey's multiple comparisons test | P Value  |                      |          |
|-----------------------------------|----------|----------------------|----------|
| ctrl media vs. 1mM Ala            | < 0.0001 | 1mM Ala vs. 8988T    | 0.0003   |
| ctrl media vs. 4mM Ala            | < 0.0001 | 4mM Ala vs. 10mM Ala | > 0.9999 |
| ctrl media vs. 10mM Ala           | < 0.0001 | 4mM Ala vs. 1mM Pyr  | 0.0046   |
| ctrl media vs. 1mM Pyr            | < 0.0001 | 4mM Ala vs. hPSC #1  | 0.0069   |
| ctrl media vs. hPSC #1            | < 0.0001 | 4mM Ala vs. 8988T    | < 0.0001 |
| ctrl media vs. 8988T              | > 0.9999 | 10mM Ala vs. 1mM Pyr | 0.0028   |
| 1mM Ala vs. 4mM Ala               | 0.0023   | 10mM Ala vs. hPSC #1 | 0.0041   |
| 1mM Ala vs. 10mM Ala              | 0.0014   | 10mM Ala vs. 8988T   | < 0.0001 |
| 1mM Ala vs. 1mM Pyr               | > 0.9999 | 1mM Pyr vs. hPSC #1  | > 0.9999 |
| 1mM Ala vs. hPSC #1               | 0.9987   | 1mM Pyr vs. 8988T    | 0.0001   |
|                                   |          | hPSC #1 vs. 8988T    | < 0.0001 |

### Figure3

Fig.3b Two-way ANOVA (n=32 for hPSC; n=38 for 8988T co-culture; n=41 for tu8902 co-culture, n=24 for Mia co-culture)

| Source of Variation | % of total variation | P value  |
|---------------------|----------------------|----------|
| Interaction         | 4.384                | 0.0023   |
| Row Factor          | 8.996                | < 0.0001 |
| Column Factor       | 9.493                | < 0.0001 |

| Tukey's multiple comparisons test    | p Value | autolysosomes                        |          |
|--------------------------------------|---------|--------------------------------------|----------|
| <b>autophagosomes</b>                |         | hPSC vs. 8988T co-culture            | 0.0002   |
| hPSC vs. 8988T co-culture            | 0.6702  | hPSC vs. 8902 co-culture             | 0.0043   |
| hPSC vs. 8902 co-culture             | 0.2225  | hPSC vs. Mia co-culture              | < 0.0001 |
| hPSC vs. Mia co-culture              | 0.6866  | 8988T co-culture vs. 8902 co-culture | 0.7582   |
| 8988T co-culture vs. 8902 co-culture | 0.8522  | 8988T co-culture vs. Mia co-culture  | 0.1368   |
| 8988T co-culture vs. Mia co-culture  | 0.9996  | 8902 co-culture vs. Mia co-culture   | 0.0131   |
| 8902 co-culture vs. Mia co-culture   | 0.9319  |                                      |          |

Fig.3c Two-way ANOVA (n=65 cells for hPSC CM, n=50 cells for 8988T CM, n=61 cells for 8902 CM, n=62 cells for MiaPaca CM)

| Source of Variation | % of total variation | P value |
|---------------------|----------------------|---------|
|---------------------|----------------------|---------|

|                                   |          |          |                         |          |
|-----------------------------------|----------|----------|-------------------------|----------|
| Interaction                       | 4.384    | 0.0023   |                         |          |
| Row Factor                        | 8.996    | < 0.0001 |                         |          |
| Column Factor                     | 9.493    | < 0.0001 |                         |          |
| Tukey's multiple comparisons test | p Value  |          | <b>autolysosomes</b>    |          |
| <b>autophagosomes</b>             |          |          |                         |          |
| hPSC cm vs. 8988T cm              | 0.6342   |          | hPSC cm vs. 8988T cm    | < 0.0001 |
| hPSC cm vs. 8902 cm               | 0.1158   |          | hPSC cm vs. 8902 cm     | < 0.0001 |
| hPSC cm vs. MiaPaca cm            | 0.5668   |          | hPSC cm vs. MiaPaca cm  | < 0.0001 |
| 8988T cm vs. 8902 cm              | 0.8224   |          | 8988T cm vs. 8902 cm    | 0.5164   |
| 8988T cm vs. MiaPaca cm           | > 0.9999 |          | 8988T cm vs. MiaPaca cm | 0.6667   |
| 8902 cm vs. MiaPaca cm            | 0.7868   |          | 8902 cm vs. MiaPaca cm  | 0.9938   |

Fig.3d One-way ANOVA:  $F=13.45$ ,  $p<0.0001$  (n=6 for ATG7 #1, #2; n=5 for ctrl, GFP, 8988T; n=3 for ATG5 #1, #2)

|                                   |          |                                       |          |
|-----------------------------------|----------|---------------------------------------|----------|
| Tukey's multiple comparisons test | p Value  | 8988T vs. hPSC - ShATG7 #2            | 0.9998   |
| Ctrl vs. 8988T                    | 0.4329   | hPSC - ShGFP vs. hPSC - ShATG5        | < 0.0001 |
| Ctrl vs. hPSC - ShGFP             | < 0.0001 | hPSC - ShGFP vs. hPSC - ShATG5 #2     | < 0.0001 |
| Ctrl vs. hPSC - ShATG5            | 0.9973   | hPSC - ShGFP vs. hPSC - ShATG7        | < 0.0001 |
| Ctrl vs. hPSC - ShATG5 #2         | > 0.9999 | hPSC - ShGFP vs. hPSC - ShATG7 #2     | 0.0001   |
| Ctrl vs. hPSC - ShATG7            | 0.6639   | hPSC - ShATG5 vs. hPSC - ShATG5 #2    | 0.9998   |
| Ctrl vs. hPSC - ShATG7 #2         | 0.2169   | hPSC - ShATG5 vs. hPSC - ShATG7       | 0.9814   |
| 8988T vs. hPSC - ShGFP            | < 0.0001 | hPSC - ShATG5 vs. hPSC - ShATG7 #2    | 0.7322   |
| 8988T vs. hPSC - ShATG5           | 0.8976   | hPSC - ShATG5 #2 vs. hPSC - ShATG7    | 0.8726   |
| 8988T vs. hPSC - ShATG5 #2        | 0.692    | hPSC - ShATG5 #2 vs. hPSC - ShATG7 #2 | 0.4721   |
| 8988T vs. hPSC - ShATG7           | 0.9991   | hPSC - ShATG7 vs. hPSC - ShATG7 #2    | 0.975    |

Fig.3e One-way ANOVA:  $F=12.13$ ,  $p=0.0078$  (n=3)

| Tukey's multiple comparisons test                              | P Value |
|----------------------------------------------------------------|---------|
| hPSC ShGFP cm (vs. 8988T cm) vs. hPSC ShATG5 cm (vs. 8988T cm) | 0.0300  |
| hPSC ShGFP cm (vs. 8988T cm) vs. ctrl media                    | 0.0075  |
| hPSC ShATG5 cm (vs. 8988T cm) vs. ctrl media                   | 0.4641  |

Fig.3f One-way ANOVA:  $F=4.883$ ,  $p=0.0551$  (n=3)

| Tukey's multiple comparisons test                                                                                                          | p Value |
|--------------------------------------------------------------------------------------------------------------------------------------------|---------|
| 8T ShGFP cell treated w/ hPSC ShGFP cm (vs. treated with 8988T cm) vs. 8T ShGFP cells treated w/ hPSC ShATG5 cm (vs treated with 8988T cm) | 0.1856  |
| 8T ShGFP cell treated w/ hPSC ShGFP cm (vs. treated with 8988T cm) vs. ctrl media                                                          | 0.0497  |
| 8T ShGFP cells treated w/ hPSC ShATG5 cm (vs treated with 8988T cm) vs. ctrl media                                                         | 0.5801  |

**Figure 4****Fig.4a** One-way ANOVA:  $F=25.53$ ,  $p<0.0001$  (n=7)

| Tukey's multiple comparisons test | p Value  | hpsc cm vs. 10% serum             | 0.9834   |
|-----------------------------------|----------|-----------------------------------|----------|
| 8t cm vs. hpsc cm                 | < 0.0001 | hpsc cm vs. 0% + ala              | 0.9611   |
| 8t cm vs. hpsc Shatg5 cm          | 0.9999   | hpsc Shatg5 cm vs. hpsc ShATG7 cm | 0.9955   |
| 8t cm vs. hpsc ShATG7 cm          | 0.9735   | hpsc Shatg5 cm vs. 10% serum      | < 0.0001 |
| 8t cm vs. 10% serum               | < 0.0001 | hpsc Shatg5 cm vs. 0% + ala       | < 0.0001 |
| 8t cm vs. 0% + ala                | < 0.0001 | hpsc ShATG7 cm vs. 10% serum      | < 0.0001 |
| hpsc cm vs. hpsc Shatg5 cm        | < 0.0001 | hpsc ShATG7 cm vs. 0% + ala       | < 0.0001 |
| hpsc cm vs. hpsc ShATG7 cm        | < 0.0001 | 10% serum vs. 0% + ala            | > 0.9999 |

**Fig.4b** One-way ANOVA:  $F=9.564$ ,  $p<0.0001$  (n=5 for hPSC alone; n=10 animals for the remaining groups)

| Tukey's multiple comparisons test | P Value  | 8T+hPSC-ShGFP vs. 8T+hPSC-ShATG7  | 0.0564   |
|-----------------------------------|----------|-----------------------------------|----------|
| 8988T vs. 8T+hPSC-ShGFP           | < 0.0001 | 8T+hPSC-ShGFP vs. hPSC shGFP      | < 0.0001 |
| 8988T vs. 8T+hPSC-ShATG5          | 0.0226   | 8T+hPSC-ShATG5 vs. 8T+hPSC-ShATG7 | 0.9977   |
| 8988T vs. 8T+hPSC-ShATG7          | 0.0494   | 8T+hPSC-ShATG5 vs. hPSC shGFP     | 0.0257   |
| 8988T vs. hPSC shGFP              | 0.9833   | 8T+hPSC-ShATG7 vs. hPSC shGFP     | 0.0484   |
| 8T+hPSC-ShGFP vs. 8T+hPSC-ShATG5  | 0.1136   |                                   |          |

**Fig.4c** Log-rank (Mantel-Cox) test, comparisons by pairs (n=10)

8988T vs. 8988T -shGFP: Chi square=18.38, p-value&lt;0.0001

8988T +hPSC-shGFP vs. 8988T +hPSC-shATG5: Chi square=4.906, p-value=0.0268

8988T +hPSC-shGFP vs. 8988T +hPSC-shATG7: Chi square=5.414, p-value=0.02

8988T +hPSC-shATG5 vs. 8988T +hPSC-shATG7: Chi square=0.5554, p-value=0.4561

**Fig.4d** One-way ANOVA:  $F=9.526$ ,  $p<0.0001$  (n=5 for mPSC alone; n=10 for remaining groups)

| Tukey's multiple comparisons test          | p Value  | shATG7                                      |        |
|--------------------------------------------|----------|---------------------------------------------|--------|
| iKRAS vs. iKRAS + mPSC-shGFP               | < 0.0001 | iKRAS + mPSC-shGFP vs. mPSC - ShGFP         | 0.0007 |
| iKRAS vs. iKRAS + mPSC-shATG5              | > 0.9999 | iKRAS + mPSC-shATG5 vs. iKRAS + mPSC-shATG7 | 0.982  |
| iKRAS vs. iKRAS + mPSC-shATG7              | 0.9675   | iKRAS + mPSC-shATG5 vs. mPSC - ShGFP        | 0.9959 |
| iKRAS vs. mPSC - ShGFP                     | 0.9984   | iKRAS + mPSC-shATG7 vs. mPSC - ShGFP        | 0.9252 |
| iKRAS + mPSC-shGFP vs. iKRAS + mPSC-shATG5 | 0.0001   |                                             |        |
| iKRAS + mPSC-shGFP vs. iKRAS + mPSC-       | 0.0007   |                                             |        |

**Fig.4e** Log-rank (Mantel-Cox) test, comparisons by pairs (n=10)

IKRAS-PDAC vs. IKRAS-PDAC+mPSC-shGFP: Chi square=6.255, p-value=0.0124

IKRAS-PDAC+mPSC-shGFP vs. IKRAS-PDAC+mPSC-shATG5: Chi square=5.322, p-value=0.0211

IKRAS-PDAC+mPSC-shGFP vs. IKRAS-PDAC+mPSC-shATG7: Chi square=8.847, p-value=0.0029

IKRAS-PDAC+mPSC-shATG5 vs. IKRAS-PDAC+mPSC-shATG7: Chi square= 0.006147, p-value=0.9375

### Extended Data Figure 1

EFig.1a One-way ANOVA, F=14.71, p<0.0001 (n=5)

| Tukey's multiple comparisons test | P Value |                        |        |
|-----------------------------------|---------|------------------------|--------|
| ctrl media vs. 8902 cm            | 0.9547  | 8902 cm vs. hPSC cm    | 0.0011 |
| ctrl media vs. hPSC cm            | 0.0004  | 8902 cm vs. hPSC #2 cm | 0.0050 |
| ctrl media vs. hPSC #2 cm         | 0.0018  | hPSC cm vs. hPSC #2 cm | 0.8709 |

EFig.1b One-way ANOVA, F=82.15, p<0.0001 (n=3 for MiaPaCa2, hPSC#2, n=4 for ctrl and hPSC#1)

| Tukey's multiple comparisons test | p Value  |                           |          |
|-----------------------------------|----------|---------------------------|----------|
| ctrl vs. MiaPaCa CM               | 0.0314   | MiaPaCa CM vs. hPSC #1 CM | < 0.0001 |
| ctrl vs. hPSC #1 CM               | < 0.0001 | MiaPaCa CM vs. hPSC #2 CM | < 0.0001 |
| ctrl vs. hPSC #2 CM               | < 0.0001 | hPSC #1 CM vs. hPSC #2 CM | 0.2459   |

EFig.1c One-way ANOVA, F=7.421, p=0.0239 (n=3)

| Tukey's multiple comparisons test | P Value |
|-----------------------------------|---------|
| Ctrl vs. Panc-1                   | 0.9220  |
| Ctrl vs. hPSC#1                   | 0.0293  |
| Panc-1 vs. hPSC#1                 | 0.0466  |

EFig.1e One-way ANOVA, F=1.910, p=0.1222 (n=3 for MiaPaCa, IMR90, primary hPSC#1, #2; n=6 for 8988T, hPSC#1 and ctrl)

| Tukey's multiple comparisons test | P Value |                                   |          |
|-----------------------------------|---------|-----------------------------------|----------|
| 8988T vs. MiaPaca                 | 0.7590  | IMR90 vs. primary hPSC#1          | 0.9997   |
| 8988T vs. IMR90                   | 0.9955  | IMR90 vs. primary hPSC#2          | 0.8772   |
| 8988T vs. primary hPSC#1          | 0.9316  | IMR90 vs. hPSC#1                  | 0.9997   |
| 8988T vs. primary hPSC#2          | 0.4219  | IMR90 vs. ctrl media              | > 0.9999 |
| 8988T vs. hPSC#1                  | 0.8721  | primary hPSC#1 vs. primary hPSC#2 | 0.9781   |
| 8988T vs. ctrl media              | 0.9995  | primary hPSC#1 vs. hPSC#1         | > 0.9999 |
| MiaPaca vs. IMR90                 | 0.5557  | primary hPSC#1 vs. ctrl media     | 0.9891   |
| MiaPaca vs. primary hPSC#1        | 0.3351  | primary hPSC#2 vs. hPSC#1         | 0.9432   |
| MiaPaca vs. primary hPSC#2        | 0.0743  | primary hPSC#2 vs. ctrl media     | 0.6247   |
| MiaPaca vs. hPSC#1                | 0.2124  | hPSC#1 vs. ctrl media             | 0.9797   |
| MiaPaca vs. ctrl media            | 0.5571  |                                   |          |

EFig.1f One-way ANOVA, F=89.58, p<0.0001 (n=3)

|                                   |          |                     |          |
|-----------------------------------|----------|---------------------|----------|
| Tukey's multiple comparisons test | p Value  | 8T vs. hPSC #1      | < 0.0001 |
| ctrl vs. 8T                       | 0.9529   | 8T vs. hPSC #2      | < 0.0001 |
| ctrl vs. hPSC #1                  | < 0.0001 | hPSC #1 vs. hPSC #2 | 0.3632   |
| ctrl vs. hPSC #2                  | < 0.0001 |                     |          |

EFig.1g One-way ANOVA,  $F=33.17$ ,  $p<0.0001$  (n=3)

|                                   |         |                     |        |
|-----------------------------------|---------|---------------------|--------|
| Tukey's multiple comparisons test | p Value | Tu8902 vs. hPSC #1  | 0.0041 |
| Ctrl vs. Tu8902                   | 0.3036  | Tu8902 vs. hPSC #2  | 0.0007 |
| Ctrl vs. hPSC #1                  | 0.0005  | hPSC #1 vs. hPSC #2 | 0.4367 |
| Ctrl vs. hPSC #2                  | 0.0001  |                     |        |

EFig.1j One-way ANOVA,  $F=0.2288$ ,  $p=0.8752$  (n=5)

|                                   |         |                      |        |
|-----------------------------------|---------|----------------------|--------|
| Tukey's multiple comparisons test | p Value | 8988T CM vs. 8902 CM | 0.8433 |
| Ctrl vs. 8988T CM                 | 0.9798  | 8988T CM vs. hPSC    | 0.9618 |
| Ctrl vs. 8902 CM                  | 0.9717  | 8902 CM vs. hPSC     | 0.9862 |
| Ctrl vs. hPSC                     | 0.9997  |                      |        |

EFig.1k One-way ANOVA,  $F=16.61$ ,  $p=0.0009$  (n=4)

|                                   |         |                            |          |
|-----------------------------------|---------|----------------------------|----------|
| Tukey's multiple comparisons test | P Value | Boiled hPSC CM vs. hPSC CM | 0.9535   |
| ctrl media vs. Boiled hPSC CM     | 0.0004  | Boiled hPSC CM vs. 8902 CM | 0.0041   |
| ctrl media vs. Boiled 8902 CM     | 0.7942  | Boiled 8902 CM vs. hPSC CM | 0.0009   |
| ctrl media vs. hPSC CM            | 0.0001  | Boiled 8902 CM vs. 8902 CM | > 0.9999 |
| ctrl media vs. 8902 CM            | 0.7451  | hPSC CM vs. 8902 CM        | 0.0011   |
| Boiled hPSC CM vs. Boiled 8902 CM | 0.0035  |                            |          |

EFig.1l One-way ANOVA,  $F=17.19$ ,  $p<0.0001$  (n=4)

|                                   |          |                            |        |
|-----------------------------------|----------|----------------------------|--------|
| Tukey's multiple comparisons test | P Value  | hPSC boiled CM vs. hPSC CM | 0.9361 |
| ctrl vs. hPSC boiled CM           | 0.0002   | hPSC boiled CM vs. Mia CM  | 0.0368 |
| ctrl vs. Mia boiled CM            | 0.4337   | Mia boiled CM vs. hPSC CM  | 0.0009 |
| ctrl vs. hPSC CM                  | < 0.0001 | Mia boiled CM vs. Mia CM   | 0.7802 |
| ctrl vs. Mia CM                   | 0.0708   | hPSC CM vs. Mia CM         | 0.0084 |
| hPSC boiled CM vs. Mia boiled CM  | 0.0040   |                            |        |

EFig.1m One-way ANOVA,  $F=15.38$ ,  $p=0.0012$  (n=4)

|                                   |         |
|-----------------------------------|---------|
| Tukey's multiple comparisons test | P Value |
| ctrl vs. 8T F/T                   | 0.2262  |
| ctrl vs. hPSC F/T                 | 0.0011  |
| 8T F/T vs. hPSC F/T               | 0.0133  |

EFig.1n One-way ANOVA,  $F=17.92$ ,  $p=0.0007$  (n=3)

|                                   |         |                     |        |
|-----------------------------------|---------|---------------------|--------|
| Tukey's multiple comparisons test | p Value | ctrl vs. hPSC >3KDa | 0.0175 |
| ctrl vs. hPSC                     | 0.0007  | hPSC vs. hPSC <3KDa | 0.8819 |
| ctrl vs. hPSC <3KDa               | 0.0015  | hPSC vs. hPSC >3KDa | 0.0996 |



hPSC <3KDa vs. hPSC >3KDa 0.2701

### Extended Data Figure 2

EFig.2b Unpaired two-tailed T-test, p-values (n=3)

|            | hPSC CM vs 8988T CM | hPSC CM vs double CM | 8988T CM vs double CM |
|------------|---------------------|----------------------|-----------------------|
| alanine    | 0.0097              | 0.0176               | 0.7665                |
| asparagine | 0.0621              | 0.3931               | 0.0125                |
| glutamate  | 0.0024              | 0.0108               | 0.4243                |
| proline    | 0.0013              | 0.0890               | 0.0024                |

EFig.2c One-way ANOVA, F=39.93, p<0.0001 (n=3)

| Tukey's multiple comparisons test | P Value  | NeAAs 1mM vs. 1mM Asp | 0.0002 |
|-----------------------------------|----------|-----------------------|--------|
| ctrl vs. NeAAs 1mM                | < 0.0001 | NeAAs 1mM vs. 1mM Gly | 0.0001 |
| ctrl vs. 1mM Ala                  | < 0.0001 | 1mM Ala vs. 1mM Asp   | 0.0059 |
| ctrl vs. 1mM Asp                  | 0.0544   | 1mM Ala vs. 1mM Gly   | 0.0024 |
| ctrl vs. 1mM Gly                  | 0.1419   | 1mM Asp vs. 1mM Gly   | 0.9670 |
| NeAAs 1mM vs. 1mM Ala             | 0.1667   |                       |        |

EFig.2e Unpaired two-tailed T-test, p-values (n=3):

|                        |         |
|------------------------|---------|
| hPSC #1 CM vs 8988T CM | 0.0001  |
| Double CM vs hPSC#1 CM | <0.0001 |

EFig.2f Unpaired two-tailed T-test, p-values (n=3)

|                         |         |                       |         |
|-------------------------|---------|-----------------------|---------|
| Ctrl media vs 8988T CM  | <0.0001 | hPSC#1 CM vs 8988T CM | <0.0001 |
| Ctrl media vs 8902 CM   | <0.0001 | hPSC#1 CM vs 8902 CM  | <0.0001 |
| Ctrl media vs hPSC#1 CM | <0.0001 | 8988T CM vs 8902 CM   | 0.0004  |

EFig.2g Unpaired two-tailed T-test, p-values (n=3):

|                       |         |
|-----------------------|---------|
| Ctrl vs hPSC #2 CM    | 0.0007  |
| Ctrl vs hPSC #1 CM    | <0.0001 |
| hPSC #1 vs hPSC #2 CM | 0.1176  |

EFig.2h Unpaired two-tailed T-test, p-values (n=3):

|                       |        |
|-----------------------|--------|
| Ctrl vs hPSC #2 CM    | 0.0004 |
| Ctrl vs hPSC #1 CM    | 0.0003 |
| hPSC #1 vs hPSC #2 CM | 0.0088 |



## EFig.2j,k two way ANOVA (n=3)

| Source of Variation | % of total variation | p value  |
|---------------------|----------------------|----------|
| Interaction         | 36.94                | < 0.0001 |
| Row Factor          | 17.63                | < 0.0001 |
| Column Factor       | 44.6                 | < 0.0001 |

| <b>4h</b>   |          | Asp vs. Trp | 0.9632   | Leu vs. Ser | > 0.9999 |
|-------------|----------|-------------|----------|-------------|----------|
| Ala vs. Asn | > 0.9999 | Asp vs. Tyr | 0.845    | Leu vs. Lac | 0.28     |
| Ala vs. Asp | > 0.9999 | Asp vs. Val | 0.9224   | Lys vs. Met | > 0.9999 |
| Ala vs. Glu | 0.7832   | Asp vs. Gln | 0.8178   | Lys vs. Phe | > 0.9999 |
| Ala vs. Pro | > 0.9999 | Asp vs. Ser | 0.8591   | Lys vs. Trp | > 0.9999 |
| Ala vs. Leu | 0.7058   | Asp vs. Lac | 0.9995   | Lys vs. Tyr | > 0.9999 |
| Ala vs. Lys | 0.8097   | Glu vs. Pro | 0.9943   | Lys vs. Val | > 0.9999 |
| Ala vs. Met | 0.7027   | Glu vs. Leu | > 0.9999 | Lys vs. Gln | > 0.9999 |
| Ala vs. Phe | 0.7519   | Glu vs. Lys | > 0.9999 | Lys vs. Ser | > 0.9999 |
| Ala vs. Trp | 0.8178   | Glu vs. Met | > 0.9999 | Lys vs. Lac | 0.3821   |
| Ala vs. Tyr | 0.5896   | Glu vs. Phe | > 0.9999 | Met vs. Phe | > 0.9999 |
| Ala vs. Val | 0.7207   | Glu vs. Trp | > 0.9999 | Met vs. Trp | > 0.9999 |
| Ala vs. Gln | 0.5519   | Glu vs. Tyr | > 0.9999 | Met vs. Tyr | > 0.9999 |
| Ala vs. Ser | 0.6105   | Glu vs. Val | > 0.9999 | Met vs. Val | > 0.9999 |
| Ala vs. Lac | > 0.9999 | Glu vs. Gln | > 0.9999 | Met vs. Gln | > 0.9999 |
| Asn vs. Asp | > 0.9999 | Glu vs. Ser | > 0.9999 | Met vs. Ser | > 0.9999 |
| Asn vs. Glu | 0.7129   | Glu vs. Lac | 0.3524   | Met vs. Lac | 0.2775   |
| Asn vs. Pro | > 0.9999 | Pro vs. Leu | 0.9866   | Phe vs. Trp | > 0.9999 |
| Asn vs. Leu | 0.6285   | Pro vs. Lys | 0.996    | Phe vs. Tyr | > 0.9999 |
| Asn vs. Lys | 0.7429   | Pro vs. Met | 0.9862   | Phe vs. Val | > 0.9999 |
| Asn vs. Met | 0.6252   | Pro vs. Phe | 0.9917   | Phe vs. Gln | > 0.9999 |
| Asn vs. Phe | 0.6783   | Pro vs. Trp | 0.9965   | Phe vs. Ser | > 0.9999 |
| Asn vs. Trp | 0.7523   | Pro vs. Tyr | 0.9647   | Phe vs. Lac | 0.321    |
| Asn vs. Tyr | 0.5091   | Pro vs. Val | 0.9884   | Trp vs. Tyr | > 0.9999 |
| Asn vs. Val | 0.6444   | Pro vs. Gln | 0.9541   | Trp vs. Val | > 0.9999 |
| Asn vs. Gln | 0.472    | Pro vs. Ser | 0.9697   | Trp vs. Gln | > 0.9999 |
| Asn vs. Ser | 0.53     | Pro vs. Lac | 0.9897   | Trp vs. Ser | > 0.9999 |
| Asn vs. Lac | > 0.9999 | Leu vs. Lys | > 0.9999 | Trp vs. Lac | 0.3917   |
| Asp vs. Glu | 0.9502   | Leu vs. Met | > 0.9999 | Tyr vs. Val | > 0.9999 |
| Asp vs. Pro | > 0.9999 | Leu vs. Phe | > 0.9999 | Tyr vs. Gln | > 0.9999 |
| Asp vs. Leu | 0.9149   | Leu vs. Trp | > 0.9999 | Tyr vs. Ser | > 0.9999 |
| Asp vs. Lys | 0.9603   | Leu vs. Tyr | > 0.9999 | Tyr vs. Lac | 0.1976   |
| Asp vs. Met | 0.9133   | Leu vs. Val | > 0.9999 | Val vs. Gln | > 0.9999 |
| Asp vs. Phe | 0.937    | Leu vs. Gln | > 0.9999 | Val vs. Ser | > 0.9999 |

|             |          |             |          |             |          |
|-------------|----------|-------------|----------|-------------|----------|
| Val vs. Lac | 0.2927   | Asp vs. Lac | > 0.9999 | Met vs. Gln | > 0.9999 |
| Gln vs. Ser | > 0.9999 | Glu vs. Pro | 0.112    | Met vs. Ser | > 0.9999 |
| Gln vs. Lac | 0.1755   | Glu vs. Leu | 0.9991   | Met vs. Lac | < 0.0001 |
| Ser vs. Lac | 0.2106   | Glu vs. Lys | > 0.9999 | Phe vs. Trp | > 0.9999 |
| <b>8h</b>   |          | Glu vs. Met | 0.9998   | Phe vs. Tyr | > 0.9999 |
| Ala vs. Asn | > 0.9999 | Glu vs. Phe | 0.9982   | Phe vs. Val | > 0.9999 |
| Ala vs. Asp | > 0.9999 | Glu vs. Trp | 0.9995   | Phe vs. Gln | > 0.9999 |
| Ala vs. Glu | 0.0007   | Glu vs. Tyr | 0.9994   | Phe vs. Ser | > 0.9999 |
| Ala vs. Pro | 0.9801   | Glu vs. Val | 0.9996   | Phe vs. Lac | < 0.0001 |
| Ala vs. Leu | < 0.0001 | Glu vs. Gln | 0.9968   | Trp vs. Tyr | > 0.9999 |
| Ala vs. Lys | < 0.0001 | Glu vs. Ser | 0.9927   | Trp vs. Val | > 0.9999 |
| Ala vs. Met | < 0.0001 | Glu vs. Lac | < 0.0001 | Trp vs. Gln | > 0.9999 |
| Ala vs. Phe | < 0.0001 | Pro vs. Leu | 0.0034   | Trp vs. Ser | > 0.9999 |
| Ala vs. Trp | < 0.0001 | Pro vs. Lys | 0.0069   | Trp vs. Lac | < 0.0001 |
| Ala vs. Tyr | < 0.0001 | Pro vs. Met | 0.0054   | Tyr vs. Val | > 0.9999 |
| Ala vs. Val | < 0.0001 | Pro vs. Phe | 0.0026   | Tyr vs. Gln | > 0.9999 |
| Ala vs. Gln | < 0.0001 | Pro vs. Trp | 0.0041   | Tyr vs. Ser | > 0.9999 |
| Ala vs. Ser | < 0.0001 | Pro vs. Tyr | 0.004    | Tyr vs. Lac | < 0.0001 |
| Ala vs. Lac | > 0.9999 | Pro vs. Val | 0.0046   | Val vs. Gln | > 0.9999 |
| Asn vs. Asp | > 0.9999 | Pro vs. Gln | 0.002    | Val vs. Ser | > 0.9999 |
| Asn vs. Glu | 0.0003   | Pro vs. Ser | 0.0013   | Val vs. Lac | < 0.0001 |
| Asn vs. Pro | 0.9347   | Pro vs. Lac | 0.6621   | Gln vs. Ser | > 0.9999 |
| Asn vs. Leu | < 0.0001 | Leu vs. Lys | > 0.9999 | Gln vs. Lac | < 0.0001 |
| Asn vs. Lys | < 0.0001 | Leu vs. Met | > 0.9999 | Ser vs. Lac | < 0.0001 |
| Asn vs. Met | < 0.0001 | Leu vs. Phe | > 0.9999 | <b>24h</b>  |          |
| Asn vs. Phe | < 0.0001 | Leu vs. Trp | > 0.9999 | Ala vs. Asn | 0.0104   |
| Asn vs. Trp | < 0.0001 | Leu vs. Tyr | > 0.9999 | Ala vs. Asp | < 0.0001 |
| Asn vs. Tyr | < 0.0001 | Leu vs. Val | > 0.9999 | Ala vs. Glu | < 0.0001 |
| Asn vs. Val | < 0.0001 | Leu vs. Gln | > 0.9999 | Ala vs. Pro | < 0.0001 |
| Asn vs. Gln | < 0.0001 | Leu vs. Ser | > 0.9999 | Ala vs. Leu | < 0.0001 |
| Asn vs. Ser | < 0.0001 | Leu vs. Lac | < 0.0001 | Ala vs. Lys | < 0.0001 |
| Asn vs. Lac | > 0.9999 | Lys vs. Met | > 0.9999 | Ala vs. Met | < 0.0001 |
| Asp vs. Glu | 0.0005   | Lys vs. Phe | > 0.9999 | Ala vs. Phe | < 0.0001 |
| Asp vs. Pro | 0.9669   | Lys vs. Trp | > 0.9999 | Ala vs. Trp | < 0.0001 |
| Asp vs. Leu | < 0.0001 | Lys vs. Tyr | > 0.9999 | Ala vs. Tyr | < 0.0001 |
| Asp vs. Lys | < 0.0001 | Lys vs. Val | > 0.9999 | Ala vs. Val | < 0.0001 |
| Asp vs. Met | < 0.0001 | Lys vs. Gln | > 0.9999 | Ala vs. Gln | < 0.0001 |
| Asp vs. Phe | < 0.0001 | Lys vs. Ser | > 0.9999 | Ala vs. Ser | < 0.0001 |
| Asp vs. Trp | < 0.0001 | Lys vs. Lac | < 0.0001 | Ala vs. Lac | < 0.0001 |
| Asp vs. Tyr | < 0.0001 | Met vs. Phe | > 0.9999 | Asn vs. Asp | 0.9964   |
| Asp vs. Val | < 0.0001 | Met vs. Trp | > 0.9999 | Asn vs. Glu | < 0.0001 |
| Asp vs. Gln | < 0.0001 | Met vs. Tyr | > 0.9999 | Asn vs. Pro | < 0.0001 |
| Asp vs. Ser | < 0.0001 | Met vs. Val | > 0.9999 | Asn vs. Leu | < 0.0001 |

|             |          |             |          |             |          |
|-------------|----------|-------------|----------|-------------|----------|
| Asn vs. Lys | < 0.0001 | Leu vs. Met | > 0.9999 | Ser vs. Lac | < 0.0001 |
| Asn vs. Met | < 0.0001 | Leu vs. Phe | > 0.9999 | <b>48h</b>  |          |
| Asn vs. Phe | < 0.0001 | Leu vs. Trp | > 0.9999 | Ala vs. Asn | < 0.0001 |
| Asn vs. Trp | < 0.0001 | Leu vs. Tyr | > 0.9999 | Ala vs. Asp | < 0.0001 |
| Asn vs. Tyr | < 0.0001 | Leu vs. Val | > 0.9999 | Ala vs. Glu | < 0.0001 |
| Asn vs. Val | < 0.0001 | Leu vs. Gln | > 0.9999 | Ala vs. Pro | < 0.0001 |
| Asn vs. Gln | < 0.0001 | Leu vs. Ser | > 0.9999 | Ala vs. Leu | < 0.0001 |
| Asn vs. Ser | < 0.0001 | Leu vs. Lac | < 0.0001 | Ala vs. Lys | < 0.0001 |
| Asn vs. Lac | 0.0263   | Lys vs. Met | > 0.9999 | Ala vs. Met | < 0.0001 |
| Asp vs. Glu | < 0.0001 | Lys vs. Phe | > 0.9999 | Ala vs. Phe | < 0.0001 |
| Asp vs. Pro | 0.0092   | Lys vs. Trp | > 0.9999 | Ala vs. Trp | < 0.0001 |
| Asp vs. Leu | < 0.0001 | Lys vs. Tyr | > 0.9999 | Ala vs. Tyr | < 0.0001 |
| Asp vs. Lys | < 0.0001 | Lys vs. Val | > 0.9999 | Ala vs. Val | < 0.0001 |
| Asp vs. Met | < 0.0001 | Lys vs. Gln | 0.9987   | Ala vs. Gln | < 0.0001 |
| Asp vs. Phe | < 0.0001 | Lys vs. Ser | 0.993    | Ala vs. Ser | < 0.0001 |
| Asp vs. Trp | < 0.0001 | Lys vs. Lac | < 0.0001 | Ala vs. Lac | < 0.0001 |
| Asp vs. Tyr | < 0.0001 | Met vs. Phe | > 0.9999 | Asn vs. Asp | < 0.0001 |
| Asp vs. Val | < 0.0001 | Met vs. Trp | > 0.9999 | Asn vs. Glu | < 0.0001 |
| Asp vs. Gln | < 0.0001 | Met vs. Tyr | > 0.9999 | Asn vs. Pro | < 0.0001 |
| Asp vs. Ser | < 0.0001 | Met vs. Val | > 0.9999 | Asn vs. Leu | < 0.0001 |
| Asp vs. Lac | 0.5006   | Met vs. Gln | > 0.9999 | Asn vs. Lys | < 0.0001 |
| Glu vs. Pro | < 0.0001 | Met vs. Ser | > 0.9999 | Asn vs. Met | < 0.0001 |
| Glu vs. Leu | 0.0002   | Met vs. Lac | < 0.0001 | Asn vs. Phe | < 0.0001 |
| Glu vs. Lys | 0.0033   | Phe vs. Trp | > 0.9999 | Asn vs. Trp | < 0.0001 |
| Glu vs. Met | 0.0003   | Phe vs. Tyr | > 0.9999 | Asn vs. Tyr | < 0.0001 |
| Glu vs. Phe | 0.0005   | Phe vs. Val | > 0.9999 | Asn vs. Val | < 0.0001 |
| Glu vs. Trp | 0.0003   | Phe vs. Gln | > 0.9999 | Asn vs. Gln | < 0.0001 |
| Glu vs. Tyr | 0.0004   | Phe vs. Ser | > 0.9999 | Asn vs. Ser | < 0.0001 |
| Glu vs. Val | 0.0002   | Phe vs. Lac | < 0.0001 | Asn vs. Lac | 0.995    |
| Glu vs. Gln | < 0.0001 | Trp vs. Tyr | > 0.9999 | Asp vs. Glu | < 0.0001 |
| Glu vs. Ser | < 0.0001 | Trp vs. Val | > 0.9999 | Asp vs. Pro | > 0.9999 |
| Glu vs. Lac | < 0.0001 | Trp vs. Gln | > 0.9999 | Asp vs. Leu | < 0.0001 |
| Pro vs. Leu | < 0.0001 | Trp vs. Ser | > 0.9999 | Asp vs. Lys | < 0.0001 |
| Pro vs. Lys | < 0.0001 | Trp vs. Lac | < 0.0001 | Asp vs. Met | < 0.0001 |
| Pro vs. Met | < 0.0001 | Tyr vs. Val | > 0.9999 | Asp vs. Phe | < 0.0001 |
| Pro vs. Phe | < 0.0001 | Tyr vs. Gln | > 0.9999 | Asp vs. Trp | < 0.0001 |
| Pro vs. Trp | < 0.0001 | Tyr vs. Ser | > 0.9999 | Asp vs. Tyr | < 0.0001 |
| Pro vs. Tyr | < 0.0001 | Tyr vs. Lac | < 0.0001 | Asp vs. Val | < 0.0001 |
| Pro vs. Val | < 0.0001 | Val vs. Gln | > 0.9999 | Asp vs. Gln | < 0.0001 |
| Pro vs. Gln | < 0.0001 | Val vs. Ser | > 0.9999 | Asp vs. Ser | < 0.0001 |
| Pro vs. Ser | < 0.0001 | Val vs. Lac | < 0.0001 | Asp vs. Lac | 0.0016   |
| Pro vs. Lac | 0.9701   | Gln vs. Ser | > 0.9999 | Glu vs. Pro | < 0.0001 |
| Leu vs. Lys | > 0.9999 | Gln vs. Lac | < 0.0001 | Glu vs. Leu | < 0.0001 |

|             |          |             |          |             |          |
|-------------|----------|-------------|----------|-------------|----------|
| Glu vs. Lys | < 0.0001 | Phe vs. Trp | > 0.9999 | Asn vs. Trp | < 0.0001 |
| Glu vs. Met | < 0.0001 | Phe vs. Tyr | > 0.9999 | Asn vs. Tyr | < 0.0001 |
| Glu vs. Phe | < 0.0001 | Phe vs. Val | > 0.9999 | Asn vs. Val | < 0.0001 |
| Glu vs. Trp | < 0.0001 | Phe vs. Gln | 0.9953   | Asn vs. Gln | < 0.0001 |
| Glu vs. Tyr | < 0.0001 | Phe vs. Ser | 0.9597   | Asn vs. Ser | < 0.0001 |
| Glu vs. Val | < 0.0001 | Phe vs. Lac | < 0.0001 | Asn vs. Lac | < 0.0001 |
| Glu vs. Gln | < 0.0001 | Trp vs. Tyr | > 0.9999 | Asp vs. Glu | < 0.0001 |
| Glu vs. Ser | < 0.0001 | Trp vs. Val | > 0.9999 | Asp vs. Pro | < 0.0001 |
| Glu vs. Lac | < 0.0001 | Trp vs. Gln | 0.9972   | Asp vs. Leu | < 0.0001 |
| Pro vs. Leu | < 0.0001 | Trp vs. Ser | 0.9711   | Asp vs. Lys | < 0.0001 |
| Pro vs. Lys | < 0.0001 | Trp vs. Lac | < 0.0001 | Asp vs. Met | < 0.0001 |
| Pro vs. Met | < 0.0001 | Tyr vs. Val | > 0.9999 | Asp vs. Phe | < 0.0001 |
| Pro vs. Phe | < 0.0001 | Tyr vs. Gln | 0.9988   | Asp vs. Trp | < 0.0001 |
| Pro vs. Trp | < 0.0001 | Tyr vs. Ser | 0.9831   | Asp vs. Tyr | < 0.0001 |
| Pro vs. Tyr | < 0.0001 | Tyr vs. Lac | < 0.0001 | Asp vs. Val | < 0.0001 |
| Pro vs. Val | < 0.0001 | Val vs. Gln | > 0.9999 | Asp vs. Gln | < 0.0001 |
| Pro vs. Gln | < 0.0001 | Val vs. Ser | 0.9972   | Asp vs. Ser | < 0.0001 |
| Pro vs. Ser | < 0.0001 | Val vs. Lac | < 0.0001 | Asp vs. Lac | 0.026    |
| Pro vs. Lac | 0.0034   | Gln vs. Ser | > 0.9999 | Glu vs. Pro | < 0.0001 |
| Leu vs. Lys | 0.9997   | Gln vs. Lac | < 0.0001 | Glu vs. Leu | < 0.0001 |
| Leu vs. Met | > 0.9999 | Ser vs. Lac | < 0.0001 | Glu vs. Lys | < 0.0001 |
| Leu vs. Phe | > 0.9999 | <b>72h</b>  |          | Glu vs. Met | < 0.0001 |
| Leu vs. Trp | > 0.9999 | Ala vs. Asn | < 0.0001 | Glu vs. Phe | < 0.0001 |
| Leu vs. Tyr | > 0.9999 | Ala vs. Asp | < 0.0001 | Glu vs. Trp | < 0.0001 |
| Leu vs. Val | > 0.9999 | Ala vs. Glu | < 0.0001 | Glu vs. Tyr | < 0.0001 |
| Leu vs. Gln | > 0.9999 | Ala vs. Pro | < 0.0001 | Glu vs. Val | < 0.0001 |
| Leu vs. Ser | 0.9966   | Ala vs. Leu | < 0.0001 | Glu vs. Gln | < 0.0001 |
| Leu vs. Lac | < 0.0001 | Ala vs. Lys | < 0.0001 | Glu vs. Ser | < 0.0001 |
| Lys vs. Met | > 0.9999 | Ala vs. Met | < 0.0001 | Glu vs. Lac | < 0.0001 |
| Lys vs. Phe | > 0.9999 | Ala vs. Phe | < 0.0001 | Pro vs. Leu | < 0.0001 |
| Lys vs. Trp | > 0.9999 | Ala vs. Trp | < 0.0001 | Pro vs. Lys | < 0.0001 |
| Lys vs. Tyr | > 0.9999 | Ala vs. Tyr | < 0.0001 | Pro vs. Met | < 0.0001 |
| Lys vs. Val | 0.9997   | Ala vs. Val | < 0.0001 | Pro vs. Phe | < 0.0001 |
| Lys vs. Gln | 0.8765   | Ala vs. Gln | < 0.0001 | Pro vs. Trp | < 0.0001 |
| Lys vs. Ser | 0.6815   | Ala vs. Ser | < 0.0001 | Pro vs. Tyr | < 0.0001 |
| Lys vs. Lac | < 0.0001 | Ala vs. Lac | < 0.0001 | Pro vs. Val | < 0.0001 |
| Met vs. Phe | > 0.9999 | Asn vs. Asp | 0.0184   | Pro vs. Gln | < 0.0001 |
| Met vs. Trp | > 0.9999 | Asn vs. Glu | < 0.0001 | Pro vs. Ser | < 0.0001 |
| Met vs. Tyr | > 0.9999 | Asn vs. Pro | < 0.0001 | Pro vs. Lac | 0.0002   |
| Met vs. Val | > 0.9999 | Asn vs. Leu | < 0.0001 | Leu vs. Lys | 0.9998   |
| Met vs. Gln | 0.9997   | Asn vs. Lys | < 0.0001 | Leu vs. Met | > 0.9999 |
| Met vs. Ser | 0.9931   | Asn vs. Met | < 0.0001 | Leu vs. Phe | > 0.9999 |
| Met vs. Lac | < 0.0001 | Asn vs. Phe | < 0.0001 | Leu vs. Trp | > 0.9999 |

|             |          |             |          |             |          |
|-------------|----------|-------------|----------|-------------|----------|
| Leu vs. Tyr | > 0.9999 | Met vs. Trp | > 0.9999 | Trp vs. Gln | 0.9892   |
| Leu vs. Val | > 0.9999 | Met vs. Tyr | > 0.9999 | Trp vs. Ser | 0.9316   |
| Leu vs. Gln | 0.9986   | Met vs. Val | > 0.9999 | Trp vs. Lac | < 0.0001 |
| Leu vs. Ser | 0.9818   | Met vs. Gln | 0.9957   | Tyr vs. Val | > 0.9999 |
| Leu vs. Lac | < 0.0001 | Met vs. Ser | 0.9618   | Tyr vs. Gln | 0.9905   |
| Lys vs. Met | > 0.9999 | Met vs. Lac | < 0.0001 | Tyr vs. Ser | 0.937    |
| Lys vs. Phe | > 0.9999 | Phe vs. Trp | > 0.9999 | Tyr vs. Lac | < 0.0001 |
| Lys vs. Trp | > 0.9999 | Phe vs. Tyr | > 0.9999 | Val vs. Gln | 0.9988   |
| Lys vs. Tyr | > 0.9999 | Phe vs. Val | > 0.9999 | Val vs. Ser | 0.9835   |
| Lys vs. Val | 0.9997   | Phe vs. Gln | 0.9814   | Val vs. Lac | < 0.0001 |
| Lys vs. Gln | 0.7549   | Phe vs. Ser | 0.903    | Gln vs. Ser | > 0.9999 |
| Lys vs. Ser | 0.5199   | Phe vs. Lac | < 0.0001 | Gln vs. Lac | < 0.0001 |
| Lys vs. Lac | < 0.0001 | Trp vs. Tyr | > 0.9999 | Ser vs. Lac | < 0.0001 |
| Met vs. Phe | > 0.9999 | Trp vs. Val | > 0.9999 |             |          |

EFig.2l two-way ANOVA (n=3)

| Source of Variation | % of total variation | P value  |
|---------------------|----------------------|----------|
| Interaction         | 22.73                | < 0.0001 |
| Row Factor          | 1.529                | < 0.0001 |
| Column Factor       | 71.75                | < 0.0001 |

|             |          |             |          |             |          |
|-------------|----------|-------------|----------|-------------|----------|
| <b>2h</b>   |          | Val vs. Phe | > 0.9999 | Ala vs. Lys | < 0.0001 |
| Asn vs. Val | > 0.9999 | Val vs. Glu | 0.9949   | Ala vs. Phe | < 0.0001 |
| Asn vs. Thr | > 0.9999 | Val vs. Trp | > 0.9999 | Ala vs. Glu | < 0.0001 |
| Asn vs. Ala | < 0.0001 | Val vs. Gln | > 0.9999 | Ala vs. Trp | < 0.0001 |
| Asn vs. Pro | 0.0367   | Val vs. Ser | 0.9921   | Ala vs. Gln | < 0.0001 |
| Asn vs. Asp | 0.4782   | Val vs. Lac | 0.0041   | Ala vs. Ser | < 0.0001 |
| Asn vs. Met | 0.7768   | Thr vs. Ala | < 0.0001 | Ala vs. Lac | < 0.0001 |
| Asn vs. Lys | 0.9996   | Thr vs. Pro | 0.0918   | Pro vs. Asp | < 0.0001 |
| Asn vs. Phe | > 0.9999 | Thr vs. Asp | 0.2729   | Pro vs. Met | < 0.0001 |
| Asn vs. Glu | 0.8135   | Thr vs. Met | 0.5567   | Pro vs. Lys | 0.365    |
| Asn vs. Trp | > 0.9999 | Thr vs. Lys | > 0.9999 | Pro vs. Phe | 0.0216   |
| Asn vs. Gln | 0.9841   | Thr vs. Phe | > 0.9999 | Pro vs. Glu | < 0.0001 |
| Asn vs. Ser | 0.7809   | Thr vs. Glu | 0.6025   | Pro vs. Trp | 0.0042   |
| Asn vs. Lac | 0.0444   | Thr vs. Trp | 0.9995   | Pro vs. Gln | 0.0002   |
| Val vs. Thr | 0.9989   | Thr vs. Gln | 0.9166   | Pro vs. Ser | < 0.0001 |
| Val vs. Ala | < 0.0001 | Thr vs. Ser | 0.5616   | Pro vs. Lac | > 0.9999 |
| Val vs. Pro | 0.0033   | Thr vs. Lac | 0.1083   | Asp vs. Met | > 0.9999 |
| Val vs. Asp | 0.9124   | Ala vs. Pro | < 0.0001 | Asp vs. Lys | 0.06     |
| Val vs. Met | 0.9917   | Ala vs. Asp | < 0.0001 | Asp vs. Phe | 0.5997   |
| Val vs. Lys | 0.9291   | Ala vs. Met | < 0.0001 | Asp vs. Glu | > 0.9999 |

|             |          |             |          |             |          |
|-------------|----------|-------------|----------|-------------|----------|
| Asp vs. Trp | 0.8854   | Asn vs. Trp | 0.9945   | Pro vs. Gln | 0.0001   |
| Asp vs. Gln | 0.9988   | Asn vs. Gln | 0.8092   | Pro vs. Ser | < 0.0001 |
| Asp vs. Ser | > 0.9999 | Asn vs. Ser | 0.3723   | Pro vs. Lac | 0.1673   |
| Asp vs. Lac | < 0.0001 | Asn vs. Lac | > 0.9999 | Asp vs. Met | > 0.9999 |
| Met vs. Lys | 0.1815   | Val vs. Thr | 0.9996   | Asp vs. Lys | 0.0349   |
| Met vs. Phe | 0.8668   | Val vs. Ala | < 0.0001 | Asp vs. Phe | 0.991    |
| Met vs. Glu | > 0.9999 | Val vs. Pro | 0.0054   | Asp vs. Glu | > 0.9999 |
| Met vs. Trp | 0.9866   | Val vs. Asp | 0.902    | Asp vs. Trp | 0.9685   |
| Met vs. Gln | > 0.9999 | Val vs. Met | 0.6919   | Asp vs. Gln | > 0.9999 |
| Met vs. Ser | > 0.9999 | Val vs. Lys | 0.8704   | Asp vs. Ser | > 0.9999 |
| Met vs. Lac | < 0.0001 | Val vs. Phe | > 0.9999 | Asp vs. Lac | 0.2078   |
| Lys vs. Phe | 0.9978   | Val vs. Glu | 0.9709   | Met vs. Lys | 0.01     |
| Lys vs. Glu | 0.2091   | Val vs. Trp | > 0.9999 | Met vs. Phe | 0.9241   |
| Lys vs. Trp | 0.9483   | Val vs. Gln | 0.9995   | Met vs. Glu | > 0.9999 |
| Lys vs. Gln | 0.5519   | Val vs. Ser | 0.9446   | Met vs. Trp | 0.8409   |
| Lys vs. Ser | 0.1843   | Val vs. Lac | 0.9973   | Met vs. Gln | 0.9966   |
| Lys vs. Lac | 0.4065   | Thr vs. Ala | < 0.0001 | Met vs. Ser | > 0.9999 |
| Phe vs. Glu | 0.894    | Thr vs. Pro | 0.1051   | Met vs. Lac | 0.0808   |
| Phe vs. Trp | > 0.9999 | Thr vs. Asp | 0.3062   | Lys vs. Phe | 0.5937   |
| Phe vs. Gln | 0.9952   | Thr vs. Met | 0.1319   | Lys vs. Glu | 0.0744   |
| Phe vs. Ser | 0.8699   | Thr vs. Lys | 0.9998   | Lys vs. Trp | 0.7329   |
| Phe vs. Lac | 0.0265   | Thr vs. Phe | 0.9818   | Lys vs. Gln | 0.2574   |
| Glu vs. Trp | 0.9913   | Thr vs. Glu | 0.4767   | Lys vs. Ser | 0.052    |
| Glu vs. Gln | > 0.9999 | Thr vs. Trp | 0.9956   | Lys vs. Lac | > 0.9999 |
| Glu vs. Ser | > 0.9999 | Thr vs. Gln | 0.8238   | Phe vs. Glu | 0.999    |
| Glu vs. Lac | < 0.0001 | Thr vs. Ser | 0.3897   | Phe vs. Trp | > 0.9999 |
| Trp vs. Gln | > 0.9999 | Thr vs. Lac | > 0.9999 | Phe vs. Gln | > 0.9999 |
| Trp vs. Ser | 0.9872   | Ala vs. Pro | < 0.0001 | Phe vs. Ser | 0.9968   |
| Trp vs. Lac | 0.0053   | Ala vs. Asp | < 0.0001 | Phe vs. Lac | 0.9491   |
| Gln vs. Ser | > 0.9999 | Ala vs. Met | < 0.0001 | Glu vs. Trp | 0.9942   |
| Gln vs. Lac | 0.0003   | Ala vs. Lys | < 0.0001 | Glu vs. Gln | > 0.9999 |
| Ser vs. Lac | < 0.0001 | Ala vs. Phe | < 0.0001 | Glu vs. Ser | > 0.9999 |
|             |          | Ala vs. Glu | < 0.0001 | Glu vs. Lac | 0.3495   |
| <b>4h</b>   |          | Ala vs. Trp | < 0.0001 | Trp vs. Gln | > 0.9999 |
| Asn vs. Val | 0.9994   | Ala vs. Gln | < 0.0001 | Trp vs. Ser | 0.9858   |
| Asn vs. Thr | > 0.9999 | Ala vs. Ser | < 0.0001 | Trp vs. Lac | 0.983    |
| Asn vs. Ala | < 0.0001 | Ala vs. Lac | < 0.0001 | Gln vs. Ser | > 0.9999 |
| Asn vs. Pro | 0.1125   | Pro vs. Asp | < 0.0001 | Gln vs. Lac | 0.7087   |
| Asn vs. Asp | 0.2908   | Pro vs. Met | < 0.0001 | Ser vs. Lac | 0.275    |
| Asn vs. Met | 0.1234   | Pro vs. Lys | 0.5699   |             |          |
| Asn vs. Lys | 0.9999   | Pro vs. Phe | 0.001    | <b>8h</b>   |          |
| Asn vs. Phe | 0.9786   | Pro vs. Glu | < 0.0001 | Asn vs. Val | 0.9786   |
| Asn vs. Glu | 0.4579   | Pro vs. Trp | 0.0022   | Asn vs. Thr | > 0.9999 |

|             |          |             |          |             |          |
|-------------|----------|-------------|----------|-------------|----------|
| Asn vs. Ala | < 0.0001 | Ala vs. Lac | < 0.0001 | Gln vs. Ser | > 0.9999 |
| Asn vs. Pro | 0.0022   | Pro vs. Asp | < 0.0001 | Gln vs. Lac | 0.9857   |
| Asn vs. Asp | 0.1351   | Pro vs. Met | < 0.0001 | Ser vs. Lac | 0.8986   |
| Asn vs. Met | 0.0055   | Pro vs. Lys | 0.1828   |             |          |
| Asn vs. Lys | 0.9782   | Pro vs. Phe | < 0.0001 | <b>24h</b>  |          |
| Asn vs. Phe | 0.1637   | Pro vs. Glu | < 0.0001 | Asn vs. Val | 0.8779   |
| Asn vs. Glu | 0.2994   | Pro vs. Trp | < 0.0001 | Asn vs. Thr | > 0.9999 |
| Asn vs. Trp | 0.863    | Pro vs. Gln | < 0.0001 | Asn vs. Ala | < 0.0001 |
| Asn vs. Gln | 0.6205   | Pro vs. Ser | < 0.0001 | Asn vs. Pro | < 0.0001 |
| Asn vs. Ser | 0.3499   | Pro vs. Lac | < 0.0001 | Asn vs. Asp | 0.5429   |
| Asn vs. Lac | 0.9998   | Asp vs. Met | 0.9989   | Asn vs. Met | 0.1056   |
| Val vs. Thr | 0.8583   | Asp vs. Lys | 0.0013   | Asn vs. Lys | > 0.9999 |
| Val vs. Ala | < 0.0001 | Asp vs. Phe | > 0.9999 | Asn vs. Phe | 0.9978   |
| Val vs. Pro | < 0.0001 | Asp vs. Glu | > 0.9999 | Asn vs. Glu | 0.9983   |
| Val vs. Asp | 0.9352   | Asp vs. Trp | 0.9941   | Asn vs. Trp | 0.9739   |
| Val vs. Met | 0.3089   | Asp vs. Gln | 0.9999   | Asn vs. Gln | 0.0439   |
| Val vs. Lys | 0.2201   | Asp vs. Ser | > 0.9999 | Asn vs. Ser | 0.0025   |
| Val vs. Phe | 0.9555   | Asp vs. Lac | 0.6423   | Asn vs. Lac | 0.0369   |
| Val vs. Glu | 0.9919   | Met vs. Lys | < 0.0001 | Val vs. Thr | 0.9738   |
| Val vs. Trp | > 0.9999 | Met vs. Phe | 0.9976   | Val vs. Ala | < 0.0001 |
| Val vs. Gln | > 0.9999 | Met vs. Glu | 0.9806   | Val vs. Pro | < 0.0001 |
| Val vs. Ser | 0.9957   | Met vs. Trp | 0.585    | Val vs. Asp | > 0.9999 |
| Val vs. Lac | > 0.9999 | Met vs. Gln | 0.8388   | Val vs. Met | 0.9853   |
| Thr vs. Ala | < 0.0001 | Met vs. Ser | 0.9686   | Val vs. Lys | 0.9705   |
| Thr vs. Pro | 0.0098   | Met vs. Lac | 0.086    | Val vs. Phe | > 0.9999 |
| Thr vs. Asp | 0.0435   | Lys vs. Phe | 0.0018   | Val vs. Glu | > 0.9999 |
| Thr vs. Met | 0.0011   | Lys vs. Glu | 0.0052   | Val vs. Trp | > 0.9999 |
| Thr vs. Lys | 0.9992   | Lys vs. Trp | 0.0817   | Val vs. Gln | 0.9228   |
| Thr vs. Phe | 0.055    | Lys vs. Gln | 0.0257   | Val vs. Ser | 0.4065   |
| Thr vs. Glu | 0.1182   | Lys vs. Ser | 0.007    | Val vs. Lac | < 0.0001 |
| Thr vs. Trp | 0.6045   | Lys vs. Lac | 0.5713   | Thr vs. Ala | < 0.0001 |
| Thr vs. Gln | 0.3326   | Phe vs. Glu | > 0.9999 | Thr vs. Pro | < 0.0001 |
| Thr vs. Ser | 0.1454   | Phe vs. Trp | 0.9969   | Thr vs. Asp | 0.7756   |
| Thr vs. Lac | 0.9913   | Phe vs. Gln | > 0.9999 | Thr vs. Met | 0.2343   |
| Ala vs. Pro | < 0.0001 | Phe vs. Ser | > 0.9999 | Thr vs. Lys | > 0.9999 |
| Ala vs. Asp | < 0.0001 | Phe vs. Lac | 0.6979   | Thr vs. Phe | > 0.9999 |
| Ala vs. Met | < 0.0001 | Glu vs. Trp | 0.9998   | Thr vs. Glu | > 0.9999 |
| Ala vs. Lys | < 0.0001 | Glu vs. Gln | > 0.9999 | Thr vs. Trp | 0.9977   |
| Ala vs. Phe | < 0.0001 | Glu vs. Ser | > 0.9999 | Thr vs. Gln | 0.112    |
| Ala vs. Glu | < 0.0001 | Glu vs. Lac | 0.8627   | Thr vs. Ser | 0.0085   |
| Ala vs. Trp | < 0.0001 | Trp vs. Gln | > 0.9999 | Thr vs. Lac | 0.0124   |
| Ala vs. Gln | < 0.0001 | Trp vs. Ser | > 0.9999 | Ala vs. Pro | < 0.0001 |
| Ala vs. Ser | < 0.0001 | Trp vs. Lac | 0.9995   | Ala vs. Asp | < 0.0001 |



|             |          |             |          |             |          |
|-------------|----------|-------------|----------|-------------|----------|
| Ala vs. Met | < 0.0001 | Asp vs. Lys | 0.7623   | Lys vs. Ser | 0.0078   |
| Ala vs. Lys | < 0.0001 | Asp vs. Phe | 0.9946   | Lys vs. Lac | 0.0134   |
| Ala vs. Phe | < 0.0001 | Asp vs. Glu | 0.9935   | Phe vs. Glu | > 0.9999 |
| Ala vs. Glu | < 0.0001 | Asp vs. Trp | 0.9998   | Phe vs. Trp | > 0.9999 |
| Ala vs. Trp | < 0.0001 | Asp vs. Gln | 0.9971   | Phe vs. Gln | 0.5206   |
| Ala vs. Gln | < 0.0001 | Asp vs. Ser | 0.7767   | Phe vs. Ser | 0.0921   |
| Ala vs. Ser | < 0.0001 | Asp vs. Lac | < 0.0001 | Phe vs. Lac | 0.0007   |
| Ala vs. Lac | < 0.0001 | Met vs. Lys | 0.2237   | Glu vs. Trp | > 0.9999 |
| Pro vs. Asp | < 0.0001 | Met vs. Phe | 0.742    | Glu vs. Gln | 0.5027   |
| Pro vs. Met | < 0.0001 | Met vs. Glu | 0.7259   | Glu vs. Ser | 0.0862   |
| Pro vs. Lys | < 0.0001 | Met vs. Trp | 0.9149   | Glu vs. Lac | 0.0008   |
| Pro vs. Phe | < 0.0001 | Met vs. Gln | > 0.9999 | Trp vs. Gln | 0.7598   |
| Pro vs. Glu | < 0.0001 | Met vs. Ser | 0.9966   | Trp vs. Ser | 0.2119   |
| Pro vs. Trp | < 0.0001 | Met vs. Lac | < 0.0001 | Trp vs. Lac | 0.0002   |
| Pro vs. Gln | < 0.0001 | Lys vs. Phe | > 0.9999 | Gln vs. Ser | 0.9999   |
| Pro vs. Ser | < 0.0001 | Lys vs. Glu | > 0.9999 | Gln vs. Lac | < 0.0001 |
| Pro vs. Lac | 0.0382   | Lys vs. Trp | 0.9972   | Ser vs. Lac | < 0.0001 |
| Asp vs. Met | > 0.9999 | Lys vs. Gln | 0.1059   |             |          |

**Extended Data Figure 3****EFig.3b** two-way ANOVA (n=3)

| Source of Variation | % of total variation | P value  |
|---------------------|----------------------|----------|
| Interaction         | 11.47                | 0.1990   |
| Row Factor          | 46.83                | < 0.0001 |
| Column Factor       | 13.02                | 0.0207   |

| Tukey's multiple comparisons test | P Value  |                     |          |
|-----------------------------------|----------|---------------------|----------|
| shGFP                             |          | hPSC CM vs. 8902 CM | 0.2225   |
| hPSC CM vs. 8902 CM               | 0.0134   | hPSC CM vs. ctrl    | 0.8256   |
| hPSC CM vs. ctrl                  | 0.0007   | 8902 CM vs. ctrl    | 0.9988   |
| 8902 CM vs. ctrl                  | 0.9980   | shGPT2 #1           |          |
| shGPT1 #1                         |          | hPSC CM vs. 8902 CM | 0.9975   |
| hPSC CM vs. 8902 CM               | 0.2074   | hPSC CM vs. ctrl    | 0.6996   |
| hPSC CM vs. ctrl                  | 0.5773   | 8902 CM vs. ctrl    | 0.9991   |
| 8902 CM vs. ctrl                  | > 0.9999 | shGPT2 #2           |          |
| shGPT1 #2                         |          | hPSC CM vs. 8902 CM | 0.6228   |
|                                   |          | hPSC CM vs. ctrl    | 0.8817   |
|                                   |          | 8902 CM vs. ctrl    | > 0.9999 |

**EFig.3c** One-way ANOVA, F=3.811, p<0.0157 (n=3)

| Tukey's multiple comparisons test | Adjusted p Value |                       |        |
|-----------------------------------|------------------|-----------------------|--------|
| ShGFP vs. ShGPT1 1                | 0.0339           | ShGFP vs. ShGPT2 2    | 0.0443 |
| ShGFP vs. ShGPT1 2                | 0.0622           | ShGFP vs. ctrl media  | 0.0129 |
| ShGFP vs. ShGPT2 1                | 0.0742           | ShGPT1 1 vs. ShGPT1 2 | 0.9996 |
|                                   |                  | ShGPT1 1 vs. ShGPT2 1 | 0.9985 |

|                         |          |                         |        |
|-------------------------|----------|-------------------------|--------|
| ShGPT1 1 vs. ShGPT2 2   | > 0.9999 | ShGPT1 2 vs. ctrl media | 0.9687 |
| ShGPT1 1 vs. ctrl media | 0.9967   | ShGPT2 1 vs. ShGPT2 2   | 0.9998 |
| ShGPT1 2 vs. ShGPT2 1   | > 0.9999 | ShGPT2 1 vs. ctrl media | 0.9502 |
| ShGPT1 2 vs. ShGPT2 2   | > 0.9999 | ShGPT2 2 vs. ctrl media | 0.9896 |

## EFig.3d Two-way ANOVA (n=3)

| Source of Variation               | % of total variation | P value  |                               |
|-----------------------------------|----------------------|----------|-------------------------------|
| Interaction                       | 40.5                 | < 0.0001 |                               |
| Row Factor                        | 9.769                | < 0.0001 |                               |
| Column Factor                     | 49.17                | < 0.0001 |                               |
| Tukey's multiple comparisons test | p Value              |          | <b>Ala (M0)</b>               |
| <b>Lactate (M0)</b>               |                      |          | Mock vs. 1mM Ala (12C)        |
| Mock vs. 1mM Ala (12C)            | 0.0001               |          | < 0.0001                      |
| Mock vs. 1mM 13C Ala              | 0.2133               |          | Mock vs. 1mM 13C Ala          |
| 1mM Ala (12C) vs. 1mM 13C Ala     | 0.0086               |          | < 0.0001                      |
|                                   |                      |          | <b>Ala 13C (M3)</b>           |
| <b>lactate (M3)</b>               |                      |          | Mock vs. 1mM Ala (12C)        |
| Mock vs. 1mM Ala (12C)            | 0.9999               |          | 0.9999                        |
| Mock vs. 1mM 13C Ala              | 0.2416               |          | Mock vs. 1mM 13C Ala          |
| 1mM Ala (12C) vs. 1mM 13C Ala     | 0.2353               |          | < 0.0001                      |
|                                   |                      |          | 1mM Ala (12C) vs. 1mM 13C Ala |
|                                   |                      |          | < 0.0001                      |

## EFig.3e Two-way ANOVA (n=3)

| Source of Variation               | % of total variation | p value  |                               |
|-----------------------------------|----------------------|----------|-------------------------------|
| Interaction                       | 64.43                | < 0.0001 |                               |
| Row Factor                        | 28.77                | < 0.0001 |                               |
| Column Factor                     | 6.234                | < 0.0001 |                               |
| Tukey's multiple comparisons test | Adjusted p Value     |          | <b>Ala 13C</b>                |
| <b>Ala</b>                        |                      |          | Mock vs. 1mM Ala (12C)        |
| Mock vs. 1mM Ala (12C)            | < 0.0001             |          | > 0.9999                      |
| Mock vs. 1mM 13C Ala              | 0.0045               |          | Mock vs. 1mM 13C Ala          |
| 1mM Ala (12C) vs. 1mM 13C Ala     | < 0.0001             |          | < 0.0001                      |
|                                   |                      |          | 1mM Ala (12C) vs. 1mM 13C Ala |
|                                   |                      |          | < 0.0001                      |

## EFig.3f Two-way ANOVA (n=3)

| Source of Variation                   | % of total variation | P value  |                      |
|---------------------------------------|----------------------|----------|----------------------|
| heavy metabolite                      | 0.000423             | 0.9314   |                      |
| label                                 | 37.44                | < 0.0001 |                      |
| Interaction: heavy metabolite x label | 62.04                | < 0.0001 |                      |
| Tukey's multiple comparisons test     | P Value              |          | Ctrl vs. 1mM Pyr 13C |
| <b>Ala M0</b>                         |                      |          | > 0.9999             |
| Ctrl vs. 1mM Pyr                      | 0.8038               |          | Ctrl vs. 1mM Ala     |
|                                       |                      |          | < 0.0001             |
|                                       |                      |          | Ctrl vs. 1mM Ala 13C |
|                                       |                      |          | 0.9169               |

|                             |          |                             |          |
|-----------------------------|----------|-----------------------------|----------|
| 1mM Pyr vs. 1mM Pyr 13C     | 0.862    | Ctrl vs. 1mM Pyr 13C        | 0.8196   |
| 1mM Pyr vs. 1mM Ala         | < 0.0001 | Ctrl vs. 1mM Ala            | > 0.9999 |
| 1mM Pyr vs. 1mM Ala 13C     | 0.9984   | Ctrl vs. 1mM Ala 13C        | < 0.0001 |
| 1mM Pyr 13C vs. 1mM Ala     | < 0.0001 | 1mM Pyr vs. 1mM Pyr 13C     | 0.8196   |
| 1mM Pyr 13C vs. 1mM Ala 13C | 0.9526   | 1mM Pyr vs. 1mM Ala         | > 0.9999 |
| 1mM Ala vs. 1mM Ala 13C     | < 0.0001 | 1mM Pyr vs. 1mM Ala 13C     | < 0.0001 |
|                             |          | 1mM Pyr 13C vs. 1mM Ala     | 0.8196   |
| <b>Ala M3</b>               |          | 1mM Pyr 13C vs. 1mM Ala 13C | < 0.0001 |
| Ctrl vs. 1mM Pyr            | > 0.9999 | 1mM Ala vs. 1mM Ala 13C     | < 0.0001 |

## EFig.3g Two-way ANOVA (n=3)

| Source of Variation                   | % of total variation | P value  |
|---------------------------------------|----------------------|----------|
| heavy metabolite                      | 0.3134               | 0.0109   |
| label                                 | 37.58                | < 0.0001 |
| Interaction: heavy metabolite x label | 61.92                | < 0.0001 |

| Tukey's multiple comparisons test | Adjusted P Value |                             |          |
|-----------------------------------|------------------|-----------------------------|----------|
| Ala M0                            |                  | Ala M3                      |          |
| Ctrl vs. 1mM Pyr                  | 0.2818           | Ctrl vs. 1mM Pyr            | > 0.9999 |
| Ctrl vs. 1mM Pyr 13C              | 0.9946           | Ctrl vs. 1mM Pyr 13C        | 0.4401   |
| Ctrl vs. 1mM Ala                  | < 0.0001         | Ctrl vs. 1mM Ala            | > 0.9999 |
| Ctrl vs. 1mM Ala 13C              | 0.4479           | Ctrl vs. 1mM Ala 13C        | < 0.0001 |
| 1mM Pyr vs. 1mM Pyr 13C           | 0.4415           | 1mM Pyr vs. 1mM Pyr 13C     | 0.4362   |
| 1mM Pyr vs. 1mM Ala               | < 0.0001         | 1mM Pyr vs. 1mM Ala         | > 0.9999 |
| 1mM Pyr vs. 1mM Ala 13C           | 0.9939           | 1mM Pyr vs. 1mM Ala 13C     | < 0.0001 |
| 1mM Pyr 13C vs. 1mM Ala           | < 0.0001         | 1mM Pyr 13C vs. 1mM Ala     | 0.4357   |
| 1mM Pyr 13C vs. 1mM Ala 13C       | 0.6493           | 1mM Pyr 13C vs. 1mM Ala 13C | < 0.0001 |
| 1mM Ala vs. 1mM Ala 13C           | < 0.0001         | 1mM Ala vs. 1mM Ala 13C     | < 0.0001 |

## EFig.3h Two-way ANOVA (n=3)

| Source of Variation                   | % of total variation | P value  |
|---------------------------------------|----------------------|----------|
| heavy metabolite                      | 0.3376               | 0.003    |
| label                                 | 37.8                 | < 0.0001 |
| Interaction: heavy metabolite x label | 61.76                | < 0.0001 |

| Tukey's multiple comparisons test | P Value |                         |          |
|-----------------------------------|---------|-------------------------|----------|
| Ala M0                            |         | Ctrl vs. 1mM Ala        | < 0.0001 |
| Ctrl vs. 1mM Pyr                  | 0.1163  | Ctrl vs. 1mM Ala 13C    | 0.1613   |
| Ctrl vs. 1mM Pyr 13C              | 0.9409  | 1mM Pyr vs. 1mM Pyr 13C | 0.3066   |
|                                   |         | 1mM Pyr vs. 1mM Ala     | < 0.0001 |

|                             |          |                             |          |
|-----------------------------|----------|-----------------------------|----------|
| 1mM Pyr vs. 1mM Ala 13C     | 0.9991   | Ctrl vs. 1mM Ala            | > 0.9999 |
| 1mM Pyr 13C vs. 1mM Ala     | < 0.0001 | Ctrl vs. 1mM Ala 13C        | < 0.0001 |
| 1mM Pyr 13C vs. 1mM Ala 13C | 0.408    | 1mM Pyr vs. 1mM Pyr 13C     | 0.3149   |
| 1mM Ala vs. 1mM Ala 13C     | < 0.0001 | 1mM Pyr vs. 1mM Ala         | > 0.9999 |
| Ala M3                      |          | 1mM Pyr vs. 1mM Ala 13C     | < 0.0001 |
| Ctrl vs. 1mM Pyr            | > 0.9999 | 1mM Pyr 13C vs. 1mM Ala     | 0.3143   |
| Ctrl vs. 1mM Pyr 13C        | 0.3217   | 1mM Pyr 13C vs. 1mM Ala 13C | < 0.0001 |
|                             |          | 1mM Ala vs. 1mM Ala 13C     | < 0.0001 |

## EFig.3k Unpaired two-tailed t-test (n=6)

p-value mock vs. 1mM Ala = 0.6086

## EFig.3l One-way ANOVA, F=24.57, p=0.0040 (n=4)

| Tukey's multiple comparisons test | P Value |                       |        |
|-----------------------------------|---------|-----------------------|--------|
| Ctrl vs. 1mM Ala                  | 0.0534  | 1mM Ala vs. 10mM Pyr  | 0.0601 |
| Ctrl vs. 1mM Pyr                  | 0.0243  | 1mM Ala vs. 10mM Lac  | 0.1116 |
| Ctrl vs. 10mM Pyr                 | 0.0528  | 1mM Pyr vs. 10mM Pyr  | 0.2285 |
| Ctrl vs. 10mM Lac                 | 0.4053  | 1mM Pyr vs. 10mM Lac  | 0.0533 |
| 1mM Ala vs. 1mM Pyr               | 0.0205  | 10mM Pyr vs. 10mM Lac | 0.0511 |

## EFig.3m One-way ANOVA, F=24.78, p=0.0092 (n=3)

| Tukey's multiple comparisons test | P Value |                       |        |
|-----------------------------------|---------|-----------------------|--------|
| Ctrl vs. 1mM Ala                  | 0.0063  | 1mM Ala vs. 10mM Pyr  | 0.0279 |
| Ctrl vs. 1mM Pyr                  | 0.0689  | 1mM Ala vs. 10mM Lac  | 0.7917 |
| Ctrl vs. 10mM Pyr                 | 0.0231  | 1mM Pyr vs. 10mM Pyr  | 0.4226 |
| Ctrl vs. 10mM Lac                 | 0.9981  | 1mM Pyr vs. 10mM Lac  | 0.1978 |
| 1mM Ala vs. 1mM Pyr               | 0.1088  | 10mM Pyr vs. 10mM Lac | 0.0384 |

## EFig.3n Two-way ANOVA (n=3)

| Source of Variation | % of total variation | p value  |
|---------------------|----------------------|----------|
| Interaction         | 0.4078               | 0.157    |
| Row Factor          | 0.2177               | 0.3469   |
| Column Factor       | 98.25                | < 0.0001 |

| Tukey's multiple comparisons test | Adjusted p Value | Lactate (M3)                  |          |
|-----------------------------------|------------------|-------------------------------|----------|
| Lactate (M0)                      |                  | Mock vs. 1mM Ala (12C)        | > 0.9999 |
| Mock vs. 1mM Ala (12C)            | 0.1402           | Mock vs. 1mM 13C Ala          | 0.4927   |
| Mock vs. 1mM 13C Ala              | 0.25             | 1mM Ala (12C) vs. 1mM 13C Ala | 0.4888   |
| 1mM Ala (12C) vs. 1mM 13C Ala     | 0.9261           |                               |          |

**Extended Data Figure6**

EFig.6a Unpaired two-tailed T-test, p-values (n=3)

|                      |        |
|----------------------|--------|
| Cit M0 Ala vs Mock : | 0.0009 |
| Cit M2 Ala vs Mock : | 0.0169 |

EFig.6h Unpaired two-tailed T-test, p-values (n=3)

|                        |          |
|------------------------|----------|
| 3PG M3 Ala vs Mock :   | 0.035515 |
| 3PSer M3 Ala vs Mock : | 0.004078 |
| Ser M3 Ala vs Mock :   | 0.017177 |
| Gly M2 Ala vs Mock :   | 0.012271 |

EFig.6i Unpaired two-tailed t-test (n=3)

|                     |        |
|---------------------|--------|
| 3PG Ala vs Mock :   | 0.0355 |
| 3PSer Ala vs Mock : | 0.0041 |

EFig.6j Unpaired two-tailed t-test (n=3)

|                     |         |
|---------------------|---------|
| 3PG Ala vs Mock :   | 0.0005  |
| 3PSer Ala vs Mock : | <0.0001 |

**Extended Data Figure7**

EFig.7c Two-way ANOVA (n= 13 for shGFP; n=12 for shATG5#1, shATG7#1 and #2; n=10 for shATG5#2)

| Source of Variation | % of total variation | p value  |
|---------------------|----------------------|----------|
| Interaction         | 18.34                | < 0.0001 |
| Row Factor          | 12.79                | 0.0011   |
| Column Factor       | 0.3974               | 0.4346   |

| Tukey's multiple comparisons test | pValue   |                       |        |
|-----------------------------------|----------|-----------------------|--------|
|                                   |          | shATG5 1 vs. shATG7 2 | 0.0697 |
|                                   |          | shATG5 2 vs. shATG7 1 | 0.9851 |
| <b>Autophagosomes</b>             |          |                       |        |
| shGFP vs. shATG5 1                | 0.0067   | shATG5 2 vs. shATG7 2 | 0.4035 |
| shGFP vs. shATG5 2                | 0.0009   | shATG7 1 vs. shATG7 2 | 0.6932 |
| shGFP vs. shATG7 1                | < 0.0001 |                       |        |
| shGFP vs. shATG7 2                | < 0.0001 |                       |        |
| shATG5 1 vs. shATG5 2             | 0.9406   |                       |        |
| shATG5 1 vs. shATG7 1             | 0.6631   | <b>Autolysosomes</b>  |        |

|                       |        |                       |        |
|-----------------------|--------|-----------------------|--------|
| shGFP vs. shATG5 1    | 0.7598 | shATG5 1 vs. shATG7 1 | 0.5642 |
| shGFP vs. shATG5 2    | 0.2345 | shATG5 1 vs. shATG7 2 | 0.9905 |
| shGFP vs. shATG7 1    | 0.9978 | shATG5 2 vs. shATG7 1 | 0.1274 |
| shGFP vs. shATG7 2    | 0.9507 | shATG5 2 vs. shATG7 2 | 0.6323 |
| shATG5 1 vs. shATG5 2 | 0.8747 | shATG7 1 vs. shATG7 2 | 0.8367 |

EFig.7g One-way ANOVA:  $F=10.87$ ,  $p=0.0010$  (n=4)

| Tukey's multiple comparisons test | P Value | hPSC#2-shGFP vs. hPSC#2-shATG5  | 0.0268 |
|-----------------------------------|---------|---------------------------------|--------|
| Ctrl vs. hPSC#2-shGFP             | 0.0006  | hPSC#2-shGFP vs. hPSC#2-shATG7  | 0.0154 |
| Ctrl vs. hPSC#2-shATG5            | 0.1539  | hPSC#2-shATG5 vs. hPSC#2-shATG7 | 0.9886 |
| Ctrl vs. hPSC#2-shATG7            | 0.2487  |                                 |        |

EFig.7h One-way ANOVA:  $F=14.92$   $p<0.0001$  (n=4 for ctrl, 8988T, 1mM Ala, hPSC groups; n=3 for hPSC shATG5 #2, hPSC shATG7 #1, hPSC shATG5 #2 + Ala, hPSC shATG7 #1 + Ala and hPSC + Ala)

| Tukey's multiple comparisons test | p Value  | 1mM Ala vs. hPSC shATG5 #2 + Ala              | 0.9678   |
|-----------------------------------|----------|-----------------------------------------------|----------|
| ctrl vs. 8988T                    | 0.9969   | 1mM Ala vs. hPSC shATG7 #1 + Ala              | 0.9988   |
| ctrl vs. 1mM Ala                  | 0.0004   | 1mM Ala vs. hPSC + Ala                        | 0.9000   |
| ctrl vs. hPSC                     | 0.0003   | hPSC vs. hPSC shATG5 #2                       | 0.0176   |
| ctrl vs. hPSC shATG5 #2           | 0.9090   | hPSC vs. hPSC shATG7 #1                       | 0.0035   |
| ctrl vs. hPSC shATG7 #1           | 0.9992   | hPSC vs. hPSC shATG5 #2 + Ala                 | 0.9864   |
| ctrl vs. hPSC shATG5 #2 + Ala     | < 0.0001 | hPSC vs. hPSC shATG7 #1 + Ala                 | 0.9998   |
| ctrl vs. hPSC shATG7 #1 + Ala     | 0.0002   | hPSC vs. hPSC + Ala                           | 0.9444   |
| ctrl vs. hPSC + Ala               | < 0.0001 | hPSC shATG5 #2 vs. hPSC shATG7 #1             | 0.9988   |
| 8988T vs. 1mM Ala                 | 0.0026   | hPSC shATG5 #2 vs. hPSC shATG5 #2 + Ala       | 0.0041   |
| 8988T vs. hPSC                    | 0.0018   | hPSC shATG5 #2 vs. hPSC shATG7 #1 + Ala       | 0.0105   |
| 8988T vs. hPSC shATG5 #2          | 0.9992   | hPSC shATG5 #2 vs. hPSC + Ala                 | 0.0023   |
| 8988T vs. hPSC shATG7 #1          | > 0.9999 | hPSC shATG7 #1 vs. hPSC shATG5 #2 + Ala       | 0.0009   |
| 8988T vs. hPSC shATG5 #2 + Ala    | 0.0005   | hPSC shATG7 #1 vs. hPSC shATG7 #1 + Ala       | 0.0023   |
| 8988T vs. hPSC shATG7 #1 + Ala    | 0.0013   | hPSC shATG7 #1 vs. hPSC + Ala                 | 0.0005   |
| 8988T vs. hPSC + Ala              | 0.0003   | hPSC shATG5 #2 + Ala vs. hPSC shATG7 #1 + Ala | > 0.9999 |
| 1mM Ala vs. hPSC                  | > 0.9999 | hPSC shATG5 #2 + Ala vs. hPSC + Ala           | > 0.9999 |
| 1mM Ala vs. hPSC shATG5 #2        | 0.0244   | hPSC shATG7 #1 + Ala vs. hPSC + Ala           | 0.9989   |
| 1mM Ala vs. hPSC shATG7 #1        | 0.0049   |                                               |          |

EFig.7i One-way ANOVA:  $F=22.69$ ,  $p=0.0016$  (n=3)

| Tukey's multiple comparisons test | Adjusted p Value |
|-----------------------------------|------------------|
| hPSC - ShGFP vs. hPSC - ShATG5    | 0.002            |
| hPSC - ShGFP vs. hPSC - ShATG7    | 0.004            |
| hPSC - ShATG5 vs. hPSC - ShATG7   | 0.7353           |

EFig.7j Unpaired two-tailed T-test, p-value (n=3)

|                            |        |                             |        |
|----------------------------|--------|-----------------------------|--------|
| ctrl media vs. hPSC        | 0.0062 | hPSC vs. hPSC shATG5        | 0.0428 |
| ctrl media vs. hPSC shATG5 | 0.0196 | hPSC vs. hPSC shATG7        | 0.0477 |
| ctrl media vs. hPSC shATG7 | 0.0028 | hPSC shATG5 vs. hPSC shATG7 | 0.5691 |

## EFig.7k Unpaired two-tailed T-test, p-value (n=3)

|                |                 |          |
|----------------|-----------------|----------|
| hPSC #2 vs.    | hPSC #2 shATG7  | 0.021311 |
| hPSC #2 vs.    | hPSC #2 10uM CQ | 0.020612 |
| hPSC #2 shATG5 | hPSC #2 shATG7  | 0.299999 |

## EFig.7m Unpaired two-tailed T-test, p-value (n=3)

|                |             |         |                 |             |        |
|----------------|-------------|---------|-----------------|-------------|--------|
| mPSC shGFP vs. | mPSC shATG5 | <0.0001 | mPSC shGFP vs.  | mPSC CQ     | 0.0001 |
| mPSC shGFP vs. | mPSC shATG7 | 0.0003  | mPSC vs.        | mPSC CQ     | 0.0110 |
| mPSC shGFP vs. | mPSC        | 0.3879  | mPSC shATG5 vs. | mPSC shATG7 | 0.0011 |

## EFig.7n One-way ANOVA for last time-point: F=13.77, p&lt;0.0001 (n=4)

| Tukey's multiple comparisons test | P Value  | shATG5 #1 vs. shATG7 #1 | 0.1284 |
|-----------------------------------|----------|-------------------------|--------|
| shGFP vs. shATG5 #1               | 0.0103   | shATG5 #1 vs. shATG7 #2 | 0.0719 |
| shGFP vs. shATG5 #2               | 0.0124   | shATG5 #2 vs. shATG7 #1 | 0.1510 |
| shGFP vs. shATG7 #1               | 0.6657   | shATG5 #2 vs. shATG7 #2 | 0.0604 |
| shGFP vs. shATG7 #2               | < 0.0001 | shATG7 #1 vs. shATG7 #2 | 0.0005 |
| shATG5 #1 vs. shATG5 #2           | > 0.9999 |                         |        |

## EFig.7o One-way ANOVA: F=0.3049, p=0.8669 (n=3)

| Tukey's multiple comparisons test | p Value  | hPSC shATG5 #1 vs. hPSC shATG7 #1 | > 0.9999 |
|-----------------------------------|----------|-----------------------------------|----------|
| hPSC shGFP vs. hPSC shATG5 #1     | 0.9166   | hPSC shATG5 #2 vs. hPSC shATG7 #2 | 0.9413   |
| hPSC shGFP vs. hPSC shATG5 #2     | 0.9956   | hPSC shATG5 #2 vs. hPSC shATG7 #1 | 0.9897   |
| hPSC shGFP vs. hPSC shATG7 #1     | 0.919    | hPSC shATG5 #2 vs. hPSC shATG7 #2 | 0.9984   |
| hPSC shGFP vs. hPSC shATG7 #2     | > 0.9999 | hPSC shATG7 #1 vs. hPSC shATG7 #2 | 0.9432   |
| hPSC shATG5 #1 vs. hPSC shATG5 #2 | 0.989    |                                   |          |

## EFig.7p One-way ANOVA: F=0.30889, p=0.6937 (n=3)

| Tukey's multiple comparisons test | p Value |
|-----------------------------------|---------|
| mPSC shGFP vs. mPSC shATG5        | 0.6879  |
| mPSC shGFP vs. mPSC shATG7        | 0.9727  |
| mPSC shATG5 vs. mPSC shATG7       | 0.8117  |

**Extended Data Figure8**

## EFig.8a One-way ANOVA, F=9.134, p=0.0005 (n=6)

| Tukey's multiple comparisons test | P Value  | Ala vs. 8988T CM     | 0.0004 |
|-----------------------------------|----------|----------------------|--------|
| Ctrl vs. Ala                      | 0.0079   | Ala vs. hPSC CM      | 0.0069 |
| Ctrl vs. 8988T CM                 | 0.5763   | 8988T CM vs. hPSC CM | 0.6148 |
| Ctrl vs. hPSC CM                  | > 0.9999 |                      |        |



**EFig.8b** One-way ANOVA,  $F=70.76$ ,  $p<0.0001$  (n=4)

| Tukey's multiple comparisons test | P Value  | 10% serum vs. hPSC2 CM | 0.0192   |
|-----------------------------------|----------|------------------------|----------|
| ctrl vs. 10% serum                | < 0.0001 | 10% serum vs. 8T CM    | < 0.0001 |
| ctrl vs. hPSC2 CM                 | < 0.0001 | hPSC2 CM vs. 8T CM     | < 0.0001 |
| ctrl vs. 8T CM                    | 0.9996   |                        |          |

**EFig.8c** One-way ANOVA,  $F=28.89$ ,  $p<0.0001$  (n=3)

| Tukey's multiple comparisons test | P Value  | 8902 CM vs. hPSC 2 CM   | 0.1392   |
|-----------------------------------|----------|-------------------------|----------|
| ctrl vs. 8902 CM                  | 0.4219   | 8902 CM vs. 10% serum   | < 0.0001 |
| ctrl vs. hPSC 2 CM                | 0.0091   | hPSC 2 CM vs. 10% serum | 0.0022   |
| ctrl vs. 10% serum                | < 0.0001 |                         |          |

**EFig.8d** One-way ANOVA:  $F=8.022$ ,  $p=0.0001$  (n=4)

| Tukey's multiple comparisons test | P Value  | hPSC shGFP vs. ctrl media     | 0.0420 |
|-----------------------------------|----------|-------------------------------|--------|
| 8T vs. hPSC shGFP                 | 0.0501   | ShATG5 vs. ShATG7             | 0.4224 |
| 8T vs. ShATG5                     | 0.7837   | ShATG5 vs. full gluc          | 0.2982 |
| 8T vs. ShATG7                     | 0.9956   | ShATG5 vs. low gluc + Ala     | 0.1327 |
| 8T vs. full gluc                  | 0.0190   | ShATG5 vs. ctrl media         | 0.7376 |
| 8T vs. low gluc + Ala             | 0.0066   | ShATG7 vs. full gluc          | 0.0048 |
| 8T vs. ctrl media                 | > 0.9999 | ShATG7 vs. low gluc + Ala     | 0.0016 |
| hPSC shGFP vs. ShATG5             | 0.5458   | ShATG7 vs. ctrl media         | 0.9980 |
| hPSC shGFP vs. ShATG7             | 0.0133   | full gluc vs. low gluc + Ala  | 0.9989 |
| hPSC shGFP vs. full gluc          | 0.9992   | full gluc vs. ctrl media      | 0.0158 |
| hPSC shGFP vs. low gluc + Ala     | 0.9634   | low gluc + Ala vs. ctrl media | 0.0054 |

**EFig.8e** One-way ANOVA:  $F=10.67$ ,  $p<0.0001$  (n=8)

| Tukey's multiple comparisons test | P Value  | hpsc cm vs. CTRL Media            | 0.0011 |
|-----------------------------------|----------|-----------------------------------|--------|
| 8t cm vs. hpsc cm                 | 0.0011   | hpsc ShATG5 cm vs. hpsc ShATG7 cm | 0.9967 |
| 8t cm vs. hpsc ShATG5 cm          | 0.9997   | hpsc ShATG5 cm vs. 10% serum      | 0.0005 |
| 8t cm vs. hpsc ShATG7 cm          | 0.9548   | hpsc ShATG5 cm vs. 0% + ala       | 0.0041 |
| 8t cm vs. 10% serum               | 0.0001   | hpsc ShATG5 cm vs. CTRL Media     | 0.9998 |
| 8t cm vs. 0% + ala                | 0.0012   | hpsc ShATG7 cm vs. 10% serum      | 0.0031 |
| 8t cm vs. CTRL Media              | > 0.9999 | hpsc ShATG7 cm vs. 0% + ala       | 0.0227 |
| hpsc cm vs. hpsc ShATG5 cm        | 0.0037   | hpsc ShATG7 cm vs. CTRL Media     | 0.9577 |
| hpsc cm vs. hpsc ShATG7 cm        | 0.0208   | 10% serum vs. 0% + ala            | 0.9925 |
| hpsc cm vs. 10% serum             | 0.9942   | 10% serum vs. CTRL Media          | 0.0001 |
| hpsc cm vs. 0% + ala              | > 0.9999 | 0% + ala vs. CTRL Media           | 0.0013 |

**EFig.8f** One-way ANOVA:  $F=18.72$ ,  $p<0.0001$  (n=6 for 0% serum + Ala; n=10 for the remaining groups)

| Tukey's multiple comparisons test | P Value  | hpsc cm vs. hpsc ShATG5 cm        | 0.0001   |
|-----------------------------------|----------|-----------------------------------|----------|
| 8902 cm vs. hpsc cm               | 0.0030   | hpsc cm vs. hpsc ShATG7 cm        | 0.0001   |
| 8902 cm vs. hpsc ShATG5 cm        | 0.9538   | hpsc cm vs. 10% serum             | 0.1156   |
| 8902 cm vs. hpsc ShATG7 cm        | 0.9546   | hpsc cm vs. 0% + ala              | > 0.9999 |
| 8902 cm vs. 10% serum             | < 0.0001 | hpsc cm vs. ctrl media            | 0.0007   |
| 8902 cm vs. 0% + ala              | 0.0202   | hpsc ShATG5 cm vs. hpsc ShATG7 cm | > 0.9999 |
| 8902 cm vs. ctrl media            | 0.9519   | hpsc ShATG5 cm vs. 10% serum      | < 0.0001 |

|                              |          |                               |          |
|------------------------------|----------|-------------------------------|----------|
| hpsc ShATG5 cm vs. 0% + ala  | 0.0015   | hpsc ShATG7 cm vs. ctrl media | > 0.9999 |
| hpsc ShATG cm vs. ctrl media | > 0.9999 | 10% serum vs. 0% + ala        | 0.2018   |
| hpsc ShATG7 cm vs. 10% serum | < 0.0001 | 10% serum vs. ctrl media      | < 0.0001 |
| hpsc ShATG7 cm vs. 0% + ala  | 0.0015   | 0% + ala vs. ctrl media       | 0.0042   |

**EFig.8g** One-way ANOVA:  $F=54.24$ ,  $p<0.0001$  (n=3)

| Tukey's multiple comparisons test    | P Value  | hPSC-shATG5 vs. hPSC-shATG5 + 1mM Ala           | < 0.0001 |
|--------------------------------------|----------|-------------------------------------------------|----------|
| ctrl vs. hPSC-ShGFP                  | < 0.0001 | hPSC-shATG5 vs. hPSC-shATG7                     | 0.2809   |
| ctrl vs. hPSC-shATG5                 | 0.9911   | hPSC-shATG5 vs. hPSC-shATG7 + 1mM Ala           | < 0.0001 |
| ctrl vs. hPSC-shATG5 + 1mM Ala       | < 0.0001 | hPSC-shATG5 vs. complete media                  | < 0.0001 |
| ctrl vs. hPSC-shATG7                 | 0.0937   | hPSC-shATG5 + 1mM Ala vs. hPSC-shATG7           | < 0.0001 |
| ctrl vs. hPSC-shATG7 + 1mM Ala       | < 0.0001 | hPSC-shATG5 + 1mM Ala vs. hPSC-shATG7 + 1mM Ala | 0.4439   |
| ctrl vs. complete media              | < 0.0001 | hPSC-shATG5 + 1mM Ala vs. complete media        | 0.9650   |
| hPSC-ShGFP vs. hPSC-shATG5           | < 0.0001 | hPSC-shATG7 vs. hPSC-shATG7 + 1mM Ala           | < 0.0001 |
| hPSC-ShGFP vs. hPSC-shATG5 + 1mM Ala | 0.2194   | hPSC-shATG7 vs. complete media                  | 0.0001   |
| hPSC-ShGFP vs. hPSC-shATG7           | 0.0018   | hPSC-shATG7 + 1mM Ala vs. complete media        | 0.1159   |
| hPSC-ShGFP vs. hPSC-shATG7 + 1mM Ala | 0.0063   |                                                 |          |
| hPSC-ShGFP vs. complete media        | 0.6710   |                                                 |          |

**EFig.8h** One-way ANOVA:  $F=58.91$   $p<0.0001$  (n=3)

| Tukey's multiple comparisons test        | p Value  | shGFP CM vs. shATG7 CM       | 0.0395   |
|------------------------------------------|----------|------------------------------|----------|
| ctrl media (no serum) vs. shGFP CM       | 0.0002   | shGFP CM vs. complete media  | 0.0003   |
| ctrl media (no serum) vs. shATG5 CM      | 0.0151   | shATG5 CM vs. shATG7 CM      | > 0.9999 |
| ctrl media (no serum) vs. shATG7 CM      | 0.0156   | shATG5 CM vs. complete media | < 0.0001 |
| ctrl media (no serum) vs. complete media | < 0.0001 | shATG7 CM vs. complete media | < 0.0001 |
| shGFP CM vs. shATG5 CM                   | 0.0408   |                              |          |

**EFig.8i** One-way ANOVA:  $F=13.45$ ,  $p=0.0005$  (n=3)

| Tukey's multiple comparisons test        | p Value | shGFP CM vs. shATG7 CM       | 0.5864   |
|------------------------------------------|---------|------------------------------|----------|
| ctrl media (no serum) vs. shGFP CM       | 0.0108  | shGFP CM vs. complete media  | 0.1048   |
| ctrl media (no serum) vs. shATG5 CM      | 0.1296  | shATG5 CM vs. shATG7 CM      | > 0.9999 |
| ctrl media (no serum) vs. shATG7 CM      | 0.1084  | shATG5 CM vs. complete media | 0.0088   |
| ctrl media (no serum) vs. complete media | 0.0002  | shATG7 CM vs. complete media | 0.0105   |
| shGFP CM vs. shATG5 CM                   | 0.5202  |                              |          |

**EFig.8j** One-way ANOVA:  $F=11,35$   $p=0.0002$  (n=4)

| Tukey's multiple comparisons test | p Value | 1mM Ala vs. 1mM Lac  | 0.0115   |
|-----------------------------------|---------|----------------------|----------|
| ctrl (0.5mM Glc) vs. 1mM Ala      | 0.0085  | 1mM Ala vs. full glc | > 0.9999 |
| ctrl (0.5mM Glc) vs. 1mM Pyr      | 0.0013  | 1mM Pyr vs. 1mM Lac  | 0.0018   |
| ctrl (0.5mM Glc) vs. 1mM Lac      | 0.9999  | 1mM Pyr vs. full glc | 0.9017   |
| ctrl (0.5mM Glc) vs. full glc     | 0.0070  | 1mM Lac vs. full glc | 0.0095   |
| 1mM Ala vs. 1mM Pyr               | 0.8623  |                      |          |

**EFig.8k** One-way ANOVA:  $F=15.07$   $p<0.0001$  (n=4)

| Tukey's multiple comparisons test | P Value |                      |        |
|-----------------------------------|---------|----------------------|--------|
| ctrl (0.5mM Glc) vs. 1mM Ala      | 0.0060  | 1mM Ala vs. 1mM Lac  | 0.0028 |
| ctrl (0.5mM Glc) vs. 1mM Pyr      | 0.0008  | 1mM Ala vs. full glc | 0.9658 |
| ctrl (0.5mM Glc) vs. 1mM Lac      | 0.9938  | 1mM Pyr vs. 1mM Lac  | 0.0004 |
| ctrl (0.5mM Glc) vs. full glc     | 0.0018  | 1mM Pyr vs. full glc | 0.9926 |
| 1mM Ala vs. 1mM Pyr               | 0.8219  | 1mM Lac vs. full glc | 0.0008 |

EFig.8l One-way ANOVA:  $F=9,797$   $p=0.0004$  (n=4)

| Tukey's multiple comparisons test             | P Value |                                               |        |
|-----------------------------------------------|---------|-----------------------------------------------|--------|
| 0.5mM Gluc vs. 0.5mM Gluc + 1mM Ala           | 0.0323  | 0.5mM Gluc + 1mM Ala vs. 0.5mM Gluc + 1mM Lac | 0.1496 |
| 0.5mM Gluc vs. 0.5mM Gluc + 1mM Pyr           | 0.0044  | 0.5mM Gluc + 1mM Ala vs. Full media           | 0.4176 |
| 0.5mM Gluc vs. 0.5mM Gluc + 1mM Lac           | 0.9115  | 0.5mM Gluc + 1mM Pyr vs. 0.5mM Gluc + 1mM Lac | 0.0229 |
| 0.5mM Gluc vs. Full media                     | 0.0010  | 0.5mM Gluc + 1mM Pyr vs. Full media           | 0.9395 |
| 0.5mM Gluc + 1mM Ala vs. 0.5mM Gluc + 1mM Pyr | 0.8385  | 0.5mM Gluc + 1mM Lac vs. Full media           | 0.0053 |

EFig.8m Two-way ANOVA (n=3)

| Source of Variation | % of total variation | P value  |
|---------------------|----------------------|----------|
| Interaction         | 11.49                | 0.0005   |
| Row Factor          | 32.61                | < 0.0001 |
| Column Factor       | 45.71                | < 0.0001 |

| Tukey's multiple comparisons test | p Value  |                          |          |
|-----------------------------------|----------|--------------------------|----------|
| <b>shGFP</b>                      |          |                          |          |
| low serum vs. hPSC CM             | < 0.0001 | hPSC CM vs. 8T CM        | 0.3507   |
| low serum vs. 8T CM               | 0.4710   | hPSC CM vs. Full serum   | 0.2107   |
| low serum vs. Full serum          | < 0.0001 | hPSC CM vs. Ala          | 0.0616   |
| low serum vs. Ala                 | 0.0060   | 8T CM vs. Full serum     | 0.0018   |
| hPSC CM vs. 8T CM                 | 0.0054   | 8T CM vs. Ala            | 0.9021   |
| hPSC CM vs. Full serum            | 0.9595   | Full serum vs. Ala       | 0.0001   |
| hPSC CM vs. Ala                   | 0.7902   | <b>shGPT2 1</b>          |          |
| 8T CM vs. Full serum              | 0.0007   | low serum vs. hPSC CM    | < 0.0001 |
| 8T CM vs. Ala                     | 0.2208   | low serum vs. 8T CM      | 0.0005   |
| Full serum vs. Ala                | 0.4202   | low serum vs. Full serum | < 0.0001 |
| <b>shGPT1 1</b>                   |          |                          |          |
| low serum vs. hPSC CM             | 0.6757   | low serum vs. Ala        | < 0.0001 |
| low serum vs. 8T CM               | 0.9737   | hPSC CM vs. 8T CM        | 0.0701   |
| low serum vs. Full serum          | 0.0005   | hPSC CM vs. Full serum   | 0.5273   |
| low serum vs. Ala                 | 0.9653   | hPSC CM vs. Ala          | 0.9999   |
| hPSC CM vs. 8T CM                 | 0.9503   | 8T CM vs. Full serum     | 0.0009   |
| hPSC CM vs. Full serum            | 0.0258   | 8T CM vs. Ala            | 0.0972   |
| hPSC CM vs. Ala                   | 0.2907   | Full serum vs. Ala       | 0.4387   |
| 8T CM vs. Full serum              | 0.0034   | <b>shGPT2 2</b>          |          |
| 8T CM vs. Ala                     | 0.7177   | low serum vs. hPSC CM    | 0.0004   |
| Full serum vs. Ala                | < 0.0001 | low serum vs. 8T CM      | 0.0216   |
| <b>shGPT1 2</b>                   |          |                          |          |
| low serum vs. hPSC CM             | 0.0493   | low serum vs. Full serum | < 0.0001 |
| low serum vs. 8T CM               | 0.8653   | low serum vs. Ala        | < 0.0001 |
| low serum vs. Full serum          | < 0.0001 | hPSC CM vs. 8T CM        | 0.6821   |
| low serum vs. Ala                 | > 0.9999 | hPSC CM vs. Full serum   | 0.0736   |
|                                   |          | hPSC CM vs. Ala          | 0.6732   |
|                                   |          | 8T CM vs. Full serum     | 0.0020   |
|                                   |          | 8T CM vs. Ala            | 0.0771   |
|                                   |          | Full serum vs. Ala       | 0.6699   |

**Extended Data Figure9**

EFig.9b Two-tailed t-tests performed for each time-point (n=10)

| <b>p-value at day:</b>           | <b>7</b>  | <b>10</b> | <b>14</b> | <b>18</b> | <b>21</b> | <b>25</b> | <b>28</b> |
|----------------------------------|-----------|-----------|-----------|-----------|-----------|-----------|-----------|
| 8988T vs. 8T+hPSC-ShGFP          | 0.0000    | 0.0002    | 0.0000    | 0.0000    | 0.0001    | 0.0000    | 0.0001    |
| 8T+hPSC-ShATG5 vs. 8T+hPSC-ShGFP | 0.0035    | 0.1258    | 0.0867    | 0.0820    | 0.0356    | 0.0072    | 0.0516    |
| 8T+hPSC-ShATG7 vs. 8T+hPSC-ShGFP | 0.0057    | 0.0194    | 0.0275    | 0.1151    | 0.1493    | 0.0371    | 0.1293    |
| hPSC vs. 8T+hPSC-ShGFP           | 0.0058    | 0.7893    | 0.0502    | 0.4836    | 0.5813    | 0.3776    | 0.2476    |
| <b>p-value at day:</b>           | <b>32</b> | <b>35</b> | <b>39</b> | <b>42</b> | <b>46</b> | <b>49</b> | <b>53</b> |
| 8988T vs. 8T+hPSC-ShGFP          | 0.0001    | 0.0000    | 0.0009    | 0.0091    | 0.0055    | 0.0072    | 0.0269    |
| 8T+hPSC-ShATG5 vs. 8T+hPSC-ShGFP | 0.1749    | 0.0410    | 0.1400    | 0.0819    | 0.0446    | 0.0887    | 0.1044    |
| 8T+hPSC-ShATG7 vs. 8T+hPSC-ShGFP | 0.0384    | 0.0226    | 0.0209    | 0.1099    | 0.0264    | 0.0477    | 0.1001    |
| hPSC vs. 8T+hPSC-ShGFP           | 0.4817    | 0.1423    | 0.0852    | 0.1027    | 0.1374    | 0.1742    | 0.2367    |
| <b>p-value at day:</b>           | <b>56</b> | <b>60</b> | <b>63</b> | <b>67</b> | <b>70</b> | <b>74</b> |           |
| 8988T vs. 8T+hPSC-ShGFP          | 0.0469    | 0.0438    | 0.1012    | 0.0968    | 0.1287    | 0.1442    |           |
| 8T+hPSC-ShATG5 vs. 8T+hPSC-ShGFP | 0.2277    | 0.1432    | 0.3806    | 0.3127    | 0.3344    | 0.3019    |           |
| 8T+hPSC-ShATG7 vs. 8T+hPSC-ShGFP | 0.1188    | 0.1351    | 0.2547    | 0.1596    | 0.2602    | 0.2836    |           |
| hPSC vs. 8T+hPSC-ShGFP           | 0.2662    | 0.2910    | 0.5014    | 0.3409    | 0.4277    | 0.4178    |           |

EFig.9c One-way ANOVA: F=8.68, p&lt;0.0001 (n=10 for MiaPaCa2 only, MiaPaCa2+hPSC-ShGFP, MiaPaCa2+hPSC-ShATG5 and MiaPaCa2+hPSC-ShATG7; n=5 for hPSC only)

| Tukey's multiple comparisons test  | p Value  | Comparison                          | p Value |
|------------------------------------|----------|-------------------------------------|---------|
| Mia vs. Mia+hPSC-ShGFP             | < 0.0001 | Mia+hPSC-ShGFP vs. Mia+hPSC-ShATG7  | 0.002   |
| Mia vs. Mia+hPSC-ShATG5            | 0.3856   | Mia+hPSC-ShGFP vs. hPSC only        | 0.0005  |
| Mia vs. Mia+hPSC-ShATG7            | 0.7352   | Mia+hPSC-ShATG5 vs. Mia+hPSC-ShATG7 | 0.9778  |
| Mia vs. hPSC only                  | 0.9994   | Mia+hPSC-ShATG5 vs. hPSC only       | 0.4463  |
| Mia+hPSC-ShGFP vs. Mia+hPSC-ShATG5 | 0.0099   | Mia+hPSC-ShATG7 vs. hPSC only       | 0.735   |

EFig.9d Log-rank (Mantel-Cox) test, comparisons by pairs (n=10)

MiaPaCa2 vs. MiaPaCa2+hPSC-shGFP: Chi square=17.89 p-value&lt;0.0001

MiaPaCa2+hPSC-shGFP vs. MiaPaCa2+hPSC-shATG5: Chi square=5.654, p-value=0.00174

MiaPaCa2+hPSC-shGFP vs. MiaPaCa2+hPSC-shATG7: Chi square=4.019, p-value=0.045

MiaPaCa2+hPSC-shATG5 vs. MiaPaCa2+hPSC-shATG7: Chi square=0.7871, p-value=0.375

EFig.9e Two-tailed t-tests performed for each time-point (n=10)

| <b>p-value at day:</b> | <b>6</b> | <b>9</b> | <b>13</b> | <b>16</b> | <b>20</b> | <b>23</b> | <b>27</b> | <b>30</b> |
|------------------------|----------|----------|-----------|-----------|-----------|-----------|-----------|-----------|
|------------------------|----------|----------|-----------|-----------|-----------|-----------|-----------|-----------|

|                                         |           |           |           |           |           |           |           |        |
|-----------------------------------------|-----------|-----------|-----------|-----------|-----------|-----------|-----------|--------|
| MiaPaCa2 vs. Mia+hPSC-ShGFP             | 0.0249    | 0.0037    | 0.0001    | 0.0002    | 0.0002    | 0.0008    | 0.0003    | 0.0000 |
| MiaPaCa2+hPSC-ShATG5 vs. Mia+hPSC-ShGFP | 0.2946    | 0.4342    | 0.0071    | 0.0052    | 0.0088    | 0.0093    | 0.0551    | 0.0177 |
| MiaPaCa2+hPSC-ShATG7 vs. Mia+hPSC-ShGFP | 0.0636    | 0.0960    | 0.0037    | 0.0287    | 0.0033    | 0.0705    | 0.1008    | 0.4414 |
| hPSC vs. MiaPaCa2+hPSC-ShGFP            | 0.1014    | 0.0262    | 0.0041    | 0.0046    | 0.0047    | 0.0099    | 0.0062    | 0.0004 |
| <b>p-value at day:</b>                  | <b>34</b> | <b>38</b> | <b>42</b> | <b>44</b> | <b>48</b> | <b>51</b> | <b>55</b> |        |
| MiaPaCa2 vs. Mia+hPSC-ShGFP             | 0.0000    | 0.0007    | 0.0010    | 0.0014    | 0.0001    | 0.0033    | 0.0113    |        |
| MiaPaCa2+hPSC-ShATG5 vs. Mia+hPSC-ShGFP | 0.0088    | 0.2006    | 0.3241    | 0.1026    | 0.1407    | 0.3739    | 0.3409    |        |
| MiaPaCa2+hPSC-ShATG7 vs. Mia+hPSC-ShGFP | 0.4766    | 0.1320    | 0.1446    | 0.1172    | 0.0905    | 0.0733    | 0.0320    |        |
| hPSC vs. MiaPaCa2+hPSC-ShGFP            | 0.0001    | 0.0048    | 0.0068    | 0.0056    | 0.0003    | 0.0058    | 0.0127    |        |

EFig.9h One-way ANOVA:  $F=0.5944$ ,  $p=0.5814$  (n=2 for shATG7; n=3 for shATG5 and n=4 for shGFP)

| Tukey's multiple comparisons test | Adjusted p Value |
|-----------------------------------|------------------|
| shGFP vs. shATG5                  | 0.5982           |
| shGFP vs. shATG7                  | > 0.9999         |
| shATG5 vs. shATG7                 | 0.6915           |

### Extended Data Figure 10

EFig.10b One-way ANOVA:  $F=7.668$ ,  $p=0.0006$  (n=5)

| Tukey's multiple comparisons test               | p Value  |
|-------------------------------------------------|----------|
| MiaPaCa vs. MiaPaca + hPSC-shGFP                | 0.0252   |
| MiaPaCa vs. Miapaca + hPSC-shATG5               | > 0.9999 |
| MiaPaCa vs. Miapaca + hPSC-shATG7               | 0.6185   |
| MiaPaCa vs. hPSC - ShGFP                        | 0.5613   |
| MiaPaca + hPSC-shGFP vs. Miapaca + hPSC-shATG5  | 0.0283   |
| MiaPaca + hPSC-shGFP vs. Miapaca + hPSC-shATG7  | 0.001    |
| MiaPaca + hPSC-shGFP vs. hPSC - ShGFP           | 0.0008   |
| Miapaca + hPSC-shATG5 vs. Miapaca + hPSC-shATG7 | 0.5859   |
| Miapaca + hPSC-shATG5 vs. hPSC - ShGFP          | 0.5289   |
| Miapaca + hPSC-shATG7 vs. hPSC - ShGFP          | > 0.9999 |

EFig.10c Log-rank (Mantel-Cox) test, comparisons by pairs (n=5).

MiaPaCa2 vs. MiaPaCa2+hPSC-shGFP: Chi square=4.782, p-value=0.0288

MiaPaCa2+hPSC-shGFP vs. MiaPaCa2+hPSC-shATG5: Chi square=4.841, p-value=0.0278

MiaPaCa2+hPSC-shGFP vs. MiaPaCa2+hPSC-shATG7: Chi square=9.851, p-value=0.0017

MiaPaCa2+hPSC-shATG5 vs. MiaPaCa2+hPSC-shATG7: Chi square=0.8667, p-value=0.3519

EFig. 10d Two-tailed t-tests performed for each time-point (n=5)

| <b>p-value at week:</b>                   | <b>1</b> | <b>2</b> | <b>3</b> | <b>4</b> | <b>5</b> |
|-------------------------------------------|----------|----------|----------|----------|----------|
| MiaPaCa2 vs. Mia+ hPSC-shGFP              | 0.0652   | 0.0631   | 0.0891   | 0.0427   | 0.0636   |
| MiaPaCa2+ hPSC-shATG5 vs. Mia+ hPSC-shGFP | 0.6837   | 0.0654   | 0.0470   | 0.0454   | 0.0988   |
| MiaPaCa2+ hPSC-shATG7 vs. Mia+ hPSC-shGFP | 0.0972   | 0.0177   | 0.0097   | 0.0032   | 0.0142   |
